# Supplementary material for: Theoretical investigations on the chiral transition of Cu(ii) chelated by bis-α-alanine in the aqueous-liquid phase
Source: Royal Society of Chemistry journal article supplement (doi:10.1039/d3nj00068k), 2023-01-01
Supplement: d3nj00068k1.pdf [file d3nj00068k1.pdf]

## **Theoretical investigations on the chiral transition of Cu(II) chelated by bis- $\alpha$ -alanine in the aqueous-liquid phase**

Chunxu Jiang,<sup>ab</sup> Yong Tan,<sup>\*a</sup> Tingting Wang,<sup>a</sup> Zuo Cheng Wang,<sup>\*b</sup> Guoqiang Peng,<sup>c</sup> Chengxin Hao,<sup>c</sup>  
and Lihong Zhao,<sup>\*c</sup>

a.School of Physics, Changchun University of Science and Technology, Changchun 130022,  
China. E-mail: tanyong@cust.edu.cn; jcx@bcnu.edu.cn;

b.The Department of Physics; The institute of theoretical and computational research, Baicheng  
Normal University, Baicheng 137000, China;

c.School of Basic Medicine, Baicheng Medical College, Baicheng 137000, China.

### **List of Contents**

|                                            |               |
|--------------------------------------------|---------------|
| <b>Energies of Pathway a,b and c .....</b> | <b>S1—S3</b>  |
| <b>Figure S1.....</b>                      | <b>S3</b>     |
| <b>Energies of Pathway d .....</b>         | <b>S3—S4</b>  |
| <b>Cartesian Coordinates .....</b>         | <b>S4—S63</b> |

## 1. Data related to the reaction potential energy surface

**Table S1.** Pathways a and b Gibbs free energy thermal corrections(Gtc), single point energies(Esp(a.u)), total free energies( $E_{total}$ ) and relative free energies of stationary point species( $\Delta G_{total}$ ) of *S*-A<sub>2</sub>-Cu(II) to *R*-allo- $\alpha$ -Ala-Cu(II) enantiomers transition in under the implicit aqueous solvent model

| Species                               | Gtc      | Esp(a.u)     | $E_{total}$ (a.u) | $\Delta G_{total}$ (kcal/mol) |
|---------------------------------------|----------|--------------|-------------------|-------------------------------|
| Pathway a and b                       |          |              |                   |                               |
| <i>S</i> -A <sub>2</sub> -Cu(II)      | 0.176190 | -2287.668597 | -2287.492407      | 0.0                           |
| <i>S</i> -T1 <sup>a(b)</sup>          | 0.175939 | -2287.664012 | -2287.488073      | 2.7                           |
| <i>S</i> -I1 <sup>a(b)</sup>          | 0.172623 | -2287.662711 | -2287.490088      | 1.5                           |
| T2 <sup>a(b)</sup>                    | 0.167132 | -2287.556375 | -2287.389243      | 64.8                          |
| I2 <sup>a(b)</sup>                    | 0.167554 | -2287.625705 | -2287.458151      | 21.5                          |
| T3 <sup>a</sup>                       | 0.167201 | -2287.556114 | -2287.388913      | 65.0                          |
| <i>R</i> -allo-I3 <sup>a</sup>        | 0.174311 | -2287.663167 | -2287.488856      | 2.2                           |
| <i>R</i> -all-T4 <sup>a</sup>         | 0.175835 | -2287.664974 | -2287.489139      | 2.1                           |
| <i>R</i> -all-ACu(II) <sup>a</sup>    | 0.176004 | -2287.668031 | -2287.492027      | 0.2                           |
| Pathway b                             |          |              |                   |                               |
| I2 <sup>a(b)</sup>                    | 0.167554 | -2287.625705 | -2287.458151      | 21.5                          |
| T3 <sup>b</sup>                       | 0.165055 | -2287.550689 | -2287.385634      | 67.1                          |
| <i>R</i> -allo-I3 <sup>b</sup>        | 0.171632 | -2287.639883 | -2287.468251      | 15.2                          |
| <i>R</i> -allo-T4 <sup>b</sup>        | 0.170352 | -2287.632812 | -2287.46246       | 18.8                          |
| <i>R</i> -allo-I4 <sup>b</sup>        | 0.172294 | -2287.638155 | -2287.465861      | 16.7                          |
| <i>R</i> -allo-T5 <sup>b</sup>        | 0.173665 | -2287.636278 | -2287.462613      | 18.7                          |
| <i>R</i> -allo-I5 <sup>b</sup>        | 0.173087 | -2287.645483 | -2287.472396      | 12.6                          |
| <i>R</i> -allo-T6 <sup>b</sup>        | 0.169918 | -2287.643396 | -2287.473478      | 11.9                          |
| <i>R</i> -allo-I6 <sup>b</sup>        | 0.172682 | -2287.663310 | -2287.490628      | 1.1                           |
| <i>R</i> -allo-T7 <sup>b</sup>        | 0.174571 | -2287.664631 | -2287.49006       | 1.5                           |
| <i>R</i> -allo- A-Cu(II) <sup>b</sup> | 0.175467 | -2287.667679 | -2287.492212      | 0.1                           |

**Table S2.** Pathway c Gibbs free energy thermal corrections(Gtc), single point energies(Esp(a.u)), total free energies( $E_{total}$ ) and relative free energies of stationary point species( $\Delta G_{total}$ ) of *S*-A<sub>2</sub>-Cu(II) to *R*-allo- $\alpha$ -Ala-Cu(II) enantiomers transition in under the implicit aqueous solvent model

| Species                          | Gtc      | Esp(a.u)     | $E_{total}$ (a.u) | $\Delta G_{total}$ (kcal/mol) |
|----------------------------------|----------|--------------|-------------------|-------------------------------|
| Pathway c                        |          |              |                   |                               |
| <i>S</i> -A <sub>2</sub> -Cu(II) | 0.176190 | -2287.668597 | -2287.492407      | 0.0                           |
| <i>S</i> -TS1 <sup>c</sup>       | 0.173984 | -2287.663571 | -2287.489587      | 1.8                           |
| <i>S</i> -INT1 <sup>c</sup>      | 0.173306 | -2287.663453 | -2287.490147      | 1.4                           |
| <i>S</i> -T2 <sup>c</sup>        | 0.169024 | -2287.643052 | -2287.474028      | 11.6                          |
| <i>S</i> -I2 <sup>c</sup>        | 0.171082 | -2287.644190 | -2287.473108      | 12.1                          |
| <i>S</i> -T3m <sup>c</sup>       | 0.169384 | -2287.618581 | -2287.449197      | 27.2                          |
| <i>S</i> -T3n <sup>c</sup>       | 0.171472 | -2287.618823 | -2287.447351      | 28.3                          |
| <i>S</i> -I3 <sup>c</sup>        | 0.176689 | -2287.636331 | -2287.459642      | 17.4                          |
| <i>S</i> -T4 <sup>c</sup>        | 0.170233 | -2287.548429 | -2287.378196      | 71.7                          |
| I4 <sup>c</sup>                  | 0.172430 | -2287.628047 | -2287.455617      | 23.1                          |

|                            |          |              |              |      |
|----------------------------|----------|--------------|--------------|------|
| R-allo-T5 <sup>c</sup>     | 0.167393 | -2287.548847 | -2287.381454 | 69.7 |
| R-allo-I5 <sup>c</sup>     | 0.174782 | -2287.635623 | -2287.460841 | 19.8 |
| R-allo-T6m <sup>c</sup>    | 0.170378 | -2287.619056 | -2287.448678 | 27.5 |
| R-allo-T6n <sup>c</sup>    | 0.170060 | -2287.618465 | -2287.448405 | 27.6 |
| R-allo-I6 <sup>c</sup>     | 0.170073 | -2287.644168 | -2287.474095 | 11.5 |
| R-allo-T7 <sup>c</sup>     | 0.168847 | -2287.642817 | -2287.47397  | 11.6 |
| R-allo-I7 <sup>c</sup>     | 0.174404 | -2287.663141 | -2287.488737 | 2.3  |
| R-allo-T8 <sup>c</sup>     | 0.175835 | -2287.664974 | -2287.489139 | 2.1  |
| R-allo-Ala <sup>c(a)</sup> | 0.176004 | -2287.668031 | -2287.492027 | 0.2  |

**Table S3.** Pathways a and b Gibbs free energy thermal corrections(Gtc), single point energies(Esp(a.u)), total free energies( $E_{total}$ ) and relative free energies of stationary point species( $\Delta G_{total}$ ) of S-A<sub>2</sub>-Cu(II) to R-allo- $\alpha$ -Ala-Cu(II) enantiomers transition in water solvent effect

| Species                                                                               | Gtc      | Esp(a.u)     | $E_{total}$ (a.u) | $\Delta G_{total}$ (kcal/mol) |
|---------------------------------------------------------------------------------------|----------|--------------|-------------------|-------------------------------|
| S-I1·(H <sub>2</sub> O) <sub>2</sub> <sup>a(b)</sup>                                  | 0.217101 | -2440.463293 | -2440.246192      | 0.0                           |
| S-T2(H <sub>2</sub> O) <sub>2</sub> <sup>a(b)</sup>                                   | 0.213294 | -2440.400426 | -2440.187132      | 37.1                          |
| I2·(H <sub>2</sub> O) <sub>2</sub> <sup>a(b)</sup>                                    | 0.215927 | -2440.425945 | -2440.210018      | 22.7                          |
| S-I1·(H <sub>2</sub> O) <sub>2</sub> ·(H <sub>2</sub> O) <sup>a(b)</sup>              | 0.242325 | -2516.875280 | -2516.632955      | 0.0                           |
| S-T2·(H <sub>2</sub> O) <sub>2</sub> ·(H <sub>2</sub> O) <sup>a(b)</sup>              | 0.239750 | -2516.813573 | -2516.573823      | 37.2                          |
| I2·(H <sub>2</sub> O) <sub>2</sub> ·(H <sub>2</sub> O) <sup>a(b)</sup>                | 0.239307 | -2516.837076 | -2516.597769      | 22.1                          |
| S-I1·(H <sub>2</sub> O) <sub>2</sub> ·(H <sub>2</sub> O) <sub>2</sub> <sup>a(b)</sup> | 0.264534 | -2593.286801 | -2593.022267      | 0.0                           |
| S-T2·(H <sub>2</sub> O) <sub>2</sub> ·(H <sub>2</sub> O) <sub>2</sub> <sup>a(b)</sup> | 0.262682 | -2593.222444 | -2592.959762      | 39.3                          |
| I2·(H <sub>2</sub> O) <sub>2</sub> ·(H <sub>2</sub> O) <sub>2</sub> <sup>a(b)</sup>   | 0.268164 | -2593.250083 | -2592.981919      | 25.3                          |
| S-I1·(H <sub>2</sub> O) <sub>2</sub> ·(H <sub>2</sub> O) <sub>3</sub> <sup>a(b)</sup> | 0.284157 | -2669.685799 | -2669.401642      | 0.0                           |
| S-T2·(H <sub>2</sub> O) <sub>2</sub> ·(H <sub>2</sub> O) <sub>3</sub> <sup>a(b)</sup> | 0.282692 | -2669.621711 | -2669.339019      | 39.3                          |
| I2·(H <sub>2</sub> O) <sub>2</sub> ·(H <sub>2</sub> O) <sub>3</sub> <sup>a(b)</sup>   | 0.283091 | -2669.643097 | -2669.360006      | 26.1                          |
| S-I1·(H <sub>2</sub> O) <sub>2</sub> ·(H <sub>2</sub> O) <sub>4</sub> <sup>a(b)</sup> | 0.307076 | -2746.089221 | -2745.782145      | 0.0                           |
| S-T2·(H <sub>2</sub> O) <sub>2</sub> ·(H <sub>2</sub> O) <sub>4</sub> <sup>a(b)</sup> | 0.307275 | -2746.025218 | -2745.717943      | 40.3                          |
| I2·(H <sub>2</sub> O) <sub>2</sub> ·(H <sub>2</sub> O) <sub>4</sub> <sup>a(b)</sup>   | 0.306009 | -2746.046181 | -2745.740172      | 26.4                          |

**Table S4.** Pathway c Gibbs free energy thermal corrections(Gtc), single point energies(Esp(a.u)), total free energies( $E_{total}$ ) and relative free energies of stationary point species( $\Delta G_{total}$ ) of S-A<sub>2</sub>-Cu(II) to R-allo- $\alpha$ -Ala-Cu(II) enantiomers transition in water solvent effect

| Species                            | Gtc      | Esp(a.u)     | $E_{total}$ (a.u) | $\Delta G_{total}$ (kcal/mol) |
|------------------------------------|----------|--------------|-------------------|-------------------------------|
| Pathway c                          |          |              |                   |                               |
| Second step                        |          |              |                   |                               |
| S-I1·H <sub>2</sub> O <sup>c</sup> | 0.194801 | -2364.063590 | -2363.868789      | 0.0                           |
| S-T2·H <sub>2</sub> O <sup>c</sup> | 0.192402 | -2364.037853 | -2363.845451      | 14.7                          |
| S-I2·H <sub>2</sub> O <sup>c</sup> | 0.192165 | -2364.041871 | -2363.849706      | 12.0                          |

|                                                        |          |              |              |       |
|--------------------------------------------------------|----------|--------------|--------------|-------|
| Fourth step                                            |          |              |              |       |
| $S\text{-I3}\cdot(\text{H}_2\text{O})_2\text{m}^c$     | 0.216817 | -2440.438020 | -2440.221203 | 0.0   |
| $S\text{-T4}\cdot(\text{H}_2\text{O})_2\text{m}^c$     | 0.214886 | -2440.394194 | -2440.179308 | 26.3  |
| $\text{I4}\cdot(\text{H}_2\text{O})_2\text{m}^c$       | 0.215429 | -2440.423554 | -2440.208125 | 8.2   |
| Fifth step                                             |          |              |              |       |
| $\text{I4}\cdot(\text{H}_2\text{O})_2\text{n}^c$       | 0.215190 | -2440.413019 | -2440.197829 | 0.0   |
| $\text{R-all-T5}\cdot(\text{H}_2\text{O})_2\text{n}^c$ | 0.215329 | -2440.394600 | -2440.179271 | 11.7  |
| $\text{R-all-I5}\cdot(\text{H}_2\text{O})_2\text{n}^c$ | 0.216794 | -2440.438134 | -2440.22134  | -14.8 |

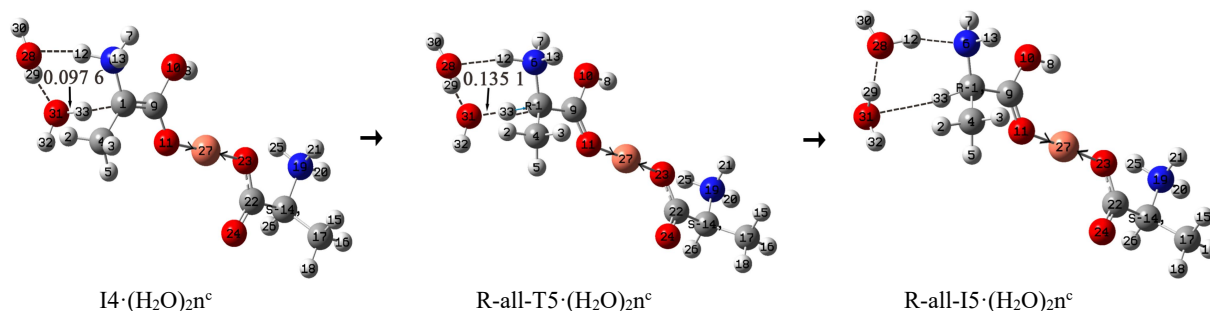

**Fig. S1** The fifth reaction step of  $S\text{-A}_2\text{-Cu(II)}$  isomerization into  $R\text{-allo-}\alpha\text{-Ala-Cu(II)}$  in the c channel under the action of water molecules (clusters)

**Table S5.** Pathway d Gibbs free energy thermal corrections(Gtc), single point energies(Esp(a.u)), total free energies( $E_{total}$ ) and relative free energies of stationary point species( $\Delta G_{total}$ ) of  $R\text{-allo-}\alpha\text{-Ala-Cu(II)}$  to  $R\text{-A}_2\text{-Cu(II)}$  enantiomers transition in under the implicit aqueous solvent model

| Species                    | Gtc      | Esp(a.u)     | $E_{total}$ (a.u) | $\Delta G_{total}$ (kcal/mol) |
|----------------------------|----------|--------------|-------------------|-------------------------------|
| Pathway d                  |          |              |                   |                               |
| $R\text{-allo-Ala}^{c(a)}$ | 0.176004 | -2287.668031 | -2287.492027      | 0.2                           |
| $R\text{-allo-T1}^d$       | 0.175835 | -2287.664974 | -2287.489139      | 2.1                           |
| $R\text{-allo-I1}^d$       | 0.174404 | -2287.663141 | -2287.488737      | 2.3                           |
| $R\text{-allo-T2}^d$       | 0.168847 | -2287.642817 | -2287.47397       | 11.6                          |
| $R\text{-allo-I2}^d$       | 0.170073 | -2287.644168 | -2287.474095      | 11.5                          |
| $R\text{-allo-T3m}^d$      | 0.170378 | -2287.619056 | -2287.448678      | 27.5                          |
| $R\text{-allo-T3n}^d$      | 0.170060 | -2287.618465 | -2287.448405      | 27.6                          |
| $R\text{-allo-I3}^d$       | 0.174782 | -2287.635623 | -2287.460841      | 19.8                          |
| $T4^d$                     | 0.167393 | -2287.548847 | -2287.381454      | 69.7                          |
| $\text{I4}^d$              | 0.172430 | -2287.628047 | -2287.455617      | 23.1                          |
| $T5^d$                     | 0.170233 | -2287.548429 | -2287.378196      | 71.7                          |
| $R\text{-I5}^d$            | 0.170671 | -2287.635425 | -2287.459642      | 17.4                          |
| $R\text{-T6m}^d$           | 0.169384 | -2287.618581 | -2287.449197      | 27.2                          |
| $R\text{-T6n}^d$           | 0.171472 | -2287.618823 | -2287.447351      | 28.3                          |
| $R\text{-I6}^d$            | 0.171082 | -2287.644190 | -2287.473108      | 12.1                          |
| $R\text{-T7}^d$            | 0.169024 | -2287.643052 | -2287.474028      | 11.6                          |
| $R\text{-I7}^d$            | 0.173306 | -2287.663453 | -2287.490147      | 1.4                           |

|                                       |          |              |              |     |
|---------------------------------------|----------|--------------|--------------|-----|
| R-T8 <sup>d</sup>                     | 0.173984 | -2287.663571 | -2287.489587 | 1.8 |
| R-A <sub>2</sub> -Cu(II) <sup>d</sup> | 0.176190 | -2287.668597 | -2287.492407 | 0.0 |

**Table S6.** Pathway d Gibbs free energy thermal corrections(Gtc), single point energies(Esp(a.u)), total free energies( $E_{total}$ ) and relative free energies of stationary point species( $\Delta G_{total}$ ) of R-allo- $\alpha$ -Ala-Cu(II) to R-A<sub>2</sub>-Cu(II) enantiomers transition in water solvent effect

| Species                                                | Gtc      | Esp(a.u)     | $E_{total}$ (a.u) | $\Delta G_{total}$ (kcal/mol) |
|--------------------------------------------------------|----------|--------------|-------------------|-------------------------------|
| Pathway d Fourth step                                  |          |              |                   |                               |
| R-allo-I3·(H <sub>2</sub> O) <sub>2</sub> <sup>d</sup> | 0.212243 | -2440.436559 | -2440.224316      | 0.0                           |
| R-allo-T4·(H <sub>2</sub> O) <sub>2</sub> <sup>d</sup> | 0.212213 | -2440.393394 | -2440.181181      | 27.1                          |
| I4·(H <sub>2</sub> O) <sub>2</sub> <sup>d</sup>        | 0.210177 | -2440.423537 | -2440.21336       | 6.9                           |

## 2. The Cartesian coordinates of the stagnation points on the potential energy surface

### 2.1 Coordinates of the relevant stationary points under the hidden water solvent effect

#### Pathway a

##### S-A<sub>2</sub>-Cu(II)

|   |             |             |             |
|---|-------------|-------------|-------------|
| C | -3.73327800 | -0.22925800 | -0.18241400 |
| H | -3.99332500 | 0.20290300  | 1.91878200  |
| H | -5.19671600 | 0.96676300  | 0.84563200  |
| C | -4.14305400 | 0.69056900  | 0.94884300  |
| H | -3.54175900 | 1.60201900  | 0.91693100  |
| N | -4.59702000 | -1.44659000 | -0.18409300 |
| H | -5.57992200 | -1.18236300 | -0.30729200 |
| H | -4.51772600 | -1.95268900 | 0.70565300  |
| C | -2.29347900 | -0.65350000 | -0.07267800 |
| O | -1.97815400 | -1.87932800 | -0.01703100 |
| O | -1.38475300 | 0.22378300  | -0.01361800 |
| H | -4.34131200 | -2.09576300 | -0.93506800 |
| H | -3.87162300 | 0.25931900  | -1.15321400 |
| C | 3.65771500  | -2.34157300 | 0.66505100  |
| H | 4.07235600  | -2.28714800 | -1.45525000 |
| H | 5.51291300  | -2.15870100 | -0.41006200 |
| C | 4.46553400  | -1.86310100 | -0.52436500 |
| H | 4.41777100  | -0.77340200 | -0.58603000 |
| N | 3.76598000  | -3.82511900 | 0.78572200  |
| H | 4.74845900  | -4.10024900 | 0.88696800  |

|    |             |             |             |
|----|-------------|-------------|-------------|
| H  | 3.39311900  | -4.28799600 | -0.05149100 |
| C  | 2.20734800  | -1.96248500 | 0.53679000  |
| O  | 1.30004700  | -2.84177600 | 0.46473300  |
| O  | 1.89206900  | -0.73819000 | 0.47388100  |
| H  | 3.24757300  | -4.18284800 | 1.59433900  |
| H  | 4.04385100  | -1.91614400 | 1.59705600  |
| Cu | -0.04188800 | -1.30621800 | 0.22374000  |

**TI<sup>a(b)</sup>**

|    |             |             |             |
|----|-------------|-------------|-------------|
| C  | -3.83467200 | -0.37271300 | -0.17361800 |
| H  | -4.27211300 | 0.02697200  | 1.90387400  |
| H  | -5.57393400 | 0.47354300  | 0.76905100  |
| C  | -4.48976600 | 0.44830400  | 0.91575900  |
| H  | -4.11283300 | 1.47291000  | 0.88004900  |
| N  | -4.40362000 | -1.75456100 | -0.17240100 |
| H  | -5.41251000 | -1.72111600 | -0.35074600 |
| H  | -4.25982900 | -2.20826700 | 0.73658900  |
| C  | -2.33336200 | -0.43851400 | -0.01873600 |
| O  | -1.77053500 | -1.59063000 | 0.00350000  |
| O  | -1.67529800 | 0.61241400  | 0.08355900  |
| H  | -3.96977100 | -2.34703900 | -0.88699400 |
| H  | -4.04814000 | 0.05067100  | -1.16148000 |
| C  | 3.70243400  | -2.38227800 | 0.65086000  |
| H  | 4.06940000  | -2.39560700 | -1.47838600 |
| H  | 5.53598700  | -2.26675100 | -0.47051600 |
| C  | 4.49240200  | -1.95268200 | -0.56931300 |
| H  | 4.46463500  | -0.86435600 | -0.66161200 |
| N  | 3.78168200  | -3.86444300 | 0.80392000  |
| H  | 4.75924400  | -4.15900000 | 0.89670300  |
| H  | 3.38475600  | -4.33678700 | -0.01679800 |
| C  | 2.25557200  | -1.98203600 | 0.53739600  |
| O  | 1.34238700  | -2.83434900 | 0.40800900  |
| O  | 1.97224900  | -0.73932400 | 0.54403700  |
| H  | 3.26744700  | -4.19206600 | 1.62783100  |
| H  | 4.11732800  | -1.94249000 | 1.56314200  |
| Cu | 0.06023100  | -1.06044500 | 0.27669600  |

**II<sup>a(b)</sup>**

|   |             |             |             |
|---|-------------|-------------|-------------|
| C | -4.08965000 | -0.34435500 | -0.18431600 |
|---|-------------|-------------|-------------|

|    |             |             |             |
|----|-------------|-------------|-------------|
| H  | -4.67220500 | 0.10096200  | 1.84768200  |
| H  | -5.90232000 | 0.49451800  | 0.61807200  |
| C  | -4.82969600 | 0.49117600  | 0.83559800  |
| H  | -4.46843500 | 1.52116000  | 0.79744600  |
| N  | -4.64310200 | -1.73319700 | -0.19406000 |
| H  | -5.63493800 | -1.71903200 | -0.45175500 |
| H  | -4.56662700 | -2.16409800 | 0.73377900  |
| C  | -2.59054500 | -0.37668300 | 0.05523200  |
| O  | -2.03613700 | -1.53906400 | 0.01937400  |
| O  | -1.99494100 | 0.68989300  | 0.23873000  |
| H  | -4.14435400 | -2.33454600 | -0.85655600 |
| H  | -4.24400200 | 0.05198400  | -1.19460100 |
| C  | 3.81219100  | -2.50364500 | 0.66421900  |
| H  | 4.20926900  | -2.42211200 | -1.45709900 |
| H  | 5.52995300  | -1.80009000 | -0.43299100 |
| C  | 4.44284900  | -1.85212000 | -0.54973600 |
| H  | 4.05841600  | -0.83581400 | -0.66493000 |
| N  | 4.38280400  | -3.87166800 | 0.84441400  |
| H  | 5.39946400  | -3.82376700 | 0.96214000  |
| H  | 4.17871400  | -4.45729100 | 0.02676000  |
| C  | 2.30854600  | -2.62746400 | 0.50292200  |
| O  | 1.78612000  | -3.72389500 | 0.27296900  |
| O  | 1.68587900  | -1.50630300 | 0.60136400  |
| H  | 3.98526600  | -4.34129400 | 1.66391400  |
| H  | 4.03571400  | -1.94302900 | 1.57675600  |
| Cu | -0.17002400 | -1.54319100 | 0.30680800  |

**T2<sup>a(b)</sup>**

|   |             |             |             |
|---|-------------|-------------|-------------|
| C | -4.01032700 | -0.01433500 | -0.18639500 |
| H | -4.36885800 | 0.14502300  | 1.96382000  |
| H | -5.43390700 | 1.14143200  | 0.94391300  |
| C | -4.41116600 | 0.76096600  | 1.04966500  |
| H | -3.75167000 | 1.62318700  | 1.19057800  |
| N | -4.86149800 | -1.23778100 | -0.28408500 |
| H | -5.84597000 | -0.96882500 | -0.37080800 |
| H | -4.78734600 | -1.84317000 | 0.54659100  |
| C | -2.57262600 | -0.33219100 | -0.22379600 |
| O | -1.95788600 | -1.33224700 | 0.21395100  |
| O | -2.02982900 | 0.66231500  | -0.86824100 |
| H | -4.63014400 | -1.80386700 | -1.10474600 |
| H | -3.18165800 | 0.89356700  | -1.08953600 |
| C | 3.89790500  | -2.38240700 | 0.63550500  |

|    |             |             |             |
|----|-------------|-------------|-------------|
| H  | 4.17807000  | -3.40513000 | -1.24619900 |
| H  | 5.58618400  | -2.45782400 | -0.69970500 |
| C  | 4.49301600  | -2.47806600 | -0.75291000 |
| H  | 4.16218300  | -1.62971300 | -1.35620300 |
| N  | 4.42601000  | -3.49365500 | 1.48186900  |
| H  | 5.44212900  | -3.41380200 | 1.58484200  |
| H  | 4.21935300  | -4.40325100 | 1.05468600  |
| C  | 2.38173200  | -2.45975100 | 0.63748200  |
| O  | 1.79326400  | -3.35197400 | 1.25839300  |
| O  | 1.81513400  | -1.52927600 | -0.04708100 |
| H  | 4.00217900  | -3.49075900 | 2.41475600  |
| H  | 4.19429900  | -1.44854300 | 1.12528200  |
| Cu | -0.06656300 | -1.51461500 | -0.02031300 |

**12<sup>a(b)</sup>**

|    |             |             |             |
|----|-------------|-------------|-------------|
| C  | 4.12094400  | 0.14905600  | -0.03812700 |
| H  | 5.81525200  | 0.77972500  | -1.13678800 |
| H  | 6.03152300  | 0.75960900  | 0.61625800  |
| C  | 5.31258400  | 0.99010400  | -0.17946900 |
| H  | 5.08553600  | 2.05761300  | -0.14088300 |
| N  | 4.34160200  | -1.23752800 | 0.31826800  |
| H  | 4.81264300  | -1.31478000 | 1.23189400  |
| H  | 4.95134900  | -1.70519500 | -0.36911900 |
| C  | 2.73902900  | 0.48718700  | -0.24723700 |
| O  | 1.85814800  | -0.37183500 | -0.06197700 |
| O  | 2.38577200  | 1.70096300  | -0.63092500 |
| H  | 3.45192900  | -1.75417500 | 0.36790900  |
| H  | 3.13450700  | 2.30359100  | -0.77774100 |
| C  | -4.16432100 | -0.13723800 | -0.20075200 |
| H  | -4.26892100 | 0.80246400  | 1.74142000  |
| H  | -5.52354300 | 1.33974400  | 0.59435100  |
| C  | -4.47299800 | 1.04701700  | 0.69181000  |
| H  | -3.85069100 | 1.89791800  | 0.40418500  |
| N  | -5.06362700 | -1.27298300 | 0.16466400  |
| H  | -6.04721300 | -1.00096500 | 0.07442800  |
| H  | -4.89677600 | -1.56192500 | 1.13489200  |
| C  | -2.71766400 | -0.58679000 | -0.04927500 |
| O  | -2.46452400 | -1.65028800 | 0.54064200  |
| O  | -1.87484700 | 0.23304900  | -0.54556400 |
| H  | -4.89782400 | -2.09107900 | -0.42874600 |
| H  | -4.36315600 | 0.09722200  | -1.25072800 |
| Cu | -0.01083300 | -0.07546300 | -0.30673200 |



**T3<sup>a</sup>**

|    |             |             |             |
|----|-------------|-------------|-------------|
| C  | 4.04340400  | 0.15803000  | -0.25051400 |
| H  | 6.02566600  | 1.00135400  | -0.18965000 |
| H  | 4.98746500  | 1.54575900  | 1.15002300  |
| C  | 5.00074200  | 1.28364500  | 0.07838000  |
| H  | 4.74602600  | 2.18165000  | -0.49346700 |
| N  | 4.35605600  | -1.00829600 | 0.62922300  |
| H  | 5.32040000  | -1.31364400 | 0.46856800  |
| H  | 3.75050600  | -1.81083700 | 0.43796700  |
| C  | 2.63364100  | 0.57250300  | -0.14287200 |
| O  | 1.86272500  | 0.55030500  | 0.84434900  |
| O  | 2.31048300  | 0.96569900  | -1.34189000 |
| H  | 4.27573700  | -0.78452700 | 1.63202500  |
| H  | 3.35942600  | 0.45588800  | -1.58688100 |
| C  | -3.86107500 | 2.16191100  | 1.33725200  |
| H  | -3.45783400 | 4.27877500  | 1.49116500  |
| H  | -4.98657700 | 3.87259500  | 0.66833000  |
| C  | -3.94167000 | 3.57592200  | 0.80286400  |
| H  | -3.44069400 | 3.63309800  | -0.16610300 |
| N  | -4.61127600 | 2.07258900  | 2.62534000  |
| H  | -5.59345600 | 2.33022400  | 2.48832400  |
| H  | -4.20970900 | 2.70801200  | 3.32353700  |
| C  | -2.43248500 | 1.70816700  | 1.58090700  |
| O  | -2.04860800 | 1.40062100  | 2.71457900  |
| O  | -1.71295700 | 1.68682000  | 0.51518300  |
| H  | -4.57699600 | 1.12705900  | 3.01831300  |
| H  | -4.33671300 | 1.45588500  | 0.64841900  |
| Cu | 0.06334600  | 1.11684800  | 0.68345800  |

**R-allo-I3<sup>a</sup>**

|   |            |             |             |
|---|------------|-------------|-------------|
| C | 4.02910600 | 0.00312400  | -0.17390300 |
| H | 6.05485600 | 0.71879100  | -0.35249300 |
| H | 4.90395300 | 1.92552700  | 0.28049800  |
| C | 5.03429300 | 1.10554300  | -0.43580100 |
| H | 4.89442400 | 1.49698900  | -1.44653500 |
| N | 4.25488700 | -0.55898200 | 1.19268100  |

|    |             |             |             |
|----|-------------|-------------|-------------|
| H  | 5.20923800  | -0.92352900 | 1.27412400  |
| H  | 3.60252300  | -1.32086100 | 1.40204700  |
| C  | 2.60885200  | 0.52111000  | -0.30568800 |
| O  | 1.95923200  | 0.66616900  | 0.79656600  |
| O  | 2.18338800  | 0.79754000  | -1.43170200 |
| H  | 4.12628400  | 0.16406100  | 1.90913700  |
| H  | 4.15949600  | -0.82353100 | -0.87849100 |
| C  | -3.69713100 | 2.44943600  | 1.36649100  |
| H  | -3.16395700 | 4.43198000  | 2.03833200  |
| H  | -4.65213300 | 4.35792100  | 1.05914300  |
| C  | -3.64250600 | 3.95169400  | 1.17633100  |
| H  | -3.06775800 | 4.19017800  | 0.27817200  |
| N  | -4.53095700 | 2.13365100  | 2.56382600  |
| H  | -5.46864600 | 2.53451600  | 2.46591300  |
| H  | -4.10197000 | 2.52373100  | 3.41096800  |
| C  | -2.31144100 | 1.86768700  | 1.57885700  |
| O  | -1.95693000 | 1.46992800  | 2.69406700  |
| O  | -1.58583700 | 1.86986600  | 0.51745500  |
| H  | -4.62597400 | 1.12344500  | 2.70591500  |
| H  | -4.16969100 | 1.95890800  | 0.51053500  |
| Cu | 0.18324600  | 1.27220800  | 0.66427700  |

**R-allo-T4<sup>a</sup>**

|   |             |             |             |
|---|-------------|-------------|-------------|
| C | -2.59398400 | 2.37453200  | 1.90384600  |
| H | -3.05824400 | 4.33682700  | 1.15565000  |
| H | -2.34552100 | 3.24212900  | -0.05919600 |
| C | -2.31543900 | 3.55045800  | 0.99185000  |
| H | -1.32603900 | 3.95829500  | 1.21128500  |
| N | -3.97243600 | 1.85744200  | 1.65540900  |
| H | -4.66363100 | 2.59142500  | 1.84274000  |
| H | -4.19278000 | 1.04951900  | 2.24645100  |
| C | -1.60328000 | 1.25836200  | 1.71051700  |
| O | -1.99785200 | 0.08863100  | 1.40149600  |
| O | -0.37185800 | 1.48263300  | 1.85068600  |
| H | -4.08245200 | 1.56625500  | 0.67699400  |
| H | -2.55516100 | 2.67815300  | 2.95564600  |
| C | 2.86174400  | -3.12738400 | 1.44890800  |
| H | 3.71315200  | -2.68228200 | -0.48666500 |
| H | 4.87466100  | -3.30762000 | 0.71392700  |
| C | 4.00181100  | -2.66347700 | 0.57005700  |
| H | 4.28041000  | -1.64240400 | 0.84030800  |

|    |             |             |            |
|----|-------------|-------------|------------|
| N  | 2.52527100  | -4.54971000 | 1.14580500 |
| H  | 3.33111200  | -5.15358100 | 1.33637100 |
| H  | 2.27331200  | -4.66260200 | 0.15719600 |
| C  | 1.61218200  | -2.29347600 | 1.30812100 |
| O  | 0.48838500  | -2.80960200 | 1.13144700 |
| O  | 1.74454600  | -1.02608200 | 1.42224900 |
| H  | 1.73286800  | -4.87788600 | 1.70688800 |
| H  | 3.15106300  | -3.09527800 | 2.50586800 |
| Cu | -0.12207600 | -0.55556700 | 1.37046700 |

R-allo-A·Cu(II)<sup>a</sup>

|    |             |             |             |
|----|-------------|-------------|-------------|
| C  | -2.40249100 | 2.52456000  | 1.93561900  |
| H  | -2.84095900 | 4.51203500  | 1.24288100  |
| H  | -2.20212400 | 3.42380700  | -0.01845800 |
| C  | -2.12570200 | 3.71025200  | 1.03640000  |
| H  | -1.11840800 | 4.08771100  | 1.22719200  |
| N  | -3.80036700 | 2.04496300  | 1.72518200  |
| H  | -4.46712600 | 2.79092600  | 1.94967000  |
| H  | -4.01927500 | 1.23167900  | 2.30943300  |
| C  | -1.45114400 | 1.38488000  | 1.69034600  |
| O  | -1.88086600 | 0.23551300  | 1.37032500  |
| O  | -0.20676300 | 1.57256100  | 1.80714600  |
| H  | -3.94933600 | 1.77367500  | 0.74627200  |
| H  | -2.32061500 | 2.80671500  | 2.99103700  |
| C  | 2.45388900  | -3.43313000 | 1.38327500  |
| H  | 3.33396600  | -3.10670300 | -0.56374400 |
| H  | 4.32346100  | -4.09051700 | 0.54813900  |
| C  | 3.64967400  | -3.23140800 | 0.47795800  |
| H  | 4.19708900  | -2.33868100 | 0.78902200  |
| N  | 1.73404200  | -4.68714300 | 1.01468200  |
| H  | 2.35199300  | -5.49702200 | 1.12898100  |
| H  | 1.43029500  | -4.66040000 | 0.03435800  |
| C  | 1.48477700  | -2.28272900 | 1.33736500  |
| O  | 0.24891300  | -2.46631800 | 1.14230000  |
| O  | 1.91689700  | -1.10484000 | 1.51393400  |
| H  | 0.90110500  | -4.83232700 | 1.59451500  |
| H  | 2.77180000  | -3.54931100 | 2.42590100  |
| Cu | 0.03147800  | -0.42297600 | 1.35608400  |

## Pathway b

Follow I2<sup>a(b)</sup>

### T3<sup>b</sup>

|    |             |             |             |
|----|-------------|-------------|-------------|
| C  | 4.10177600  | 0.10375600  | -0.33911700 |
| H  | 6.17214100  | 0.40021500  | -0.75977000 |
| H  | 5.56538800  | 1.37909200  | 0.59047700  |
| C  | 5.31088500  | 0.97253400  | -0.39824600 |
| H  | 5.18357500  | 1.80741900  | -1.09447900 |
| N  | 4.31540300  | -1.26552200 | 0.29396200  |
| H  | 5.27225600  | -1.37538900 | 0.61708100  |
| H  | 4.10912000  | -1.02847200 | -0.92036100 |
| C  | 2.77103200  | 0.52900800  | -0.30543000 |
| O  | 1.83724800  | -0.21733500 | 0.12838900  |
| O  | 2.40529800  | 1.72973200  | -0.77149700 |
| H  | 3.59701100  | -1.52444200 | 0.96738400  |
| H  | 3.16725300  | 2.25944500  | -1.05838800 |
| C  | -4.12404900 | -0.01861500 | -0.20972700 |
| H  | -4.32002600 | 0.85772200  | 1.75572200  |
| H  | -5.54849600 | 1.39374200  | 0.58007300  |
| C  | -4.49420900 | 1.12832100  | 0.70762500  |
| H  | -3.88787900 | 2.00436800  | 0.46634200  |
| N  | -5.00853700 | -1.18701600 | 0.07393000  |
| H  | -5.99087600 | -0.93861000 | -0.07861300 |
| H  | -4.90468300 | -1.48921900 | 1.04909800  |
| C  | -2.67910900 | -0.45166800 | -0.03323500 |
| O  | -2.39622600 | -1.57732300 | 0.38883800  |
| O  | -1.83718000 | 0.46672100  | -0.35293600 |
| H  | -4.77984800 | -1.98907900 | -0.52094300 |
| H  | -4.28388400 | 0.25095500  | -1.25869000 |
| Cu | -0.00671100 | 0.13050100  | -0.13758200 |

### R-allo-13<sup>b</sup>

|   |            |             |             |
|---|------------|-------------|-------------|
| C | 4.10177600 | 0.10375600  | -0.33911700 |
| H | 6.17214100 | 0.40021500  | -0.75977000 |
| H | 5.56538800 | 1.37909200  | 0.59047700  |
| C | 5.31088500 | 0.97253400  | -0.39824600 |
| H | 5.18357500 | 1.80741900  | -1.09447900 |
| N | 4.31540300 | -1.26552200 | 0.29396200  |
| H | 5.27225600 | -1.37538900 | 0.61708100  |

|    |             |             |             |
|----|-------------|-------------|-------------|
| H  | 4.10912000  | -1.02847200 | -0.92036100 |
| C  | 2.77103200  | 0.52900800  | -0.30543000 |
| O  | 1.83724800  | -0.21733500 | 0.12838900  |
| O  | 2.40529800  | 1.72973200  | -0.77149700 |
| H  | 3.59701100  | -1.52444200 | 0.96738400  |
| H  | 3.16725300  | 2.25944500  | -1.05838800 |
| C  | -4.12404900 | -0.01861500 | -0.20972700 |
| H  | -4.32002600 | 0.85772200  | 1.75572200  |
| H  | -5.54849600 | 1.39374200  | 0.58007300  |
| C  | -4.49420900 | 1.12832100  | 0.70762500  |
| H  | -3.88787900 | 2.00436800  | 0.46634200  |
| N  | -5.00853700 | -1.18701600 | 0.07393000  |
| H  | -5.99087600 | -0.93861000 | -0.07861300 |
| H  | -4.90468300 | -1.48921900 | 1.04909800  |
| C  | -2.67910900 | -0.45166800 | -0.03323500 |
| O  | -2.39622600 | -1.57732300 | 0.38883800  |
| O  | -1.83718000 | 0.46672100  | -0.35293600 |
| H  | -4.77984800 | -1.98907900 | -0.52094300 |
| H  | -4.28388400 | 0.25095500  | -1.25869000 |
| Cu | -0.00671100 | 0.13050100  | -0.13758200 |

**R-allo-T4<sup>b</sup>**

|   |             |             |             |
|---|-------------|-------------|-------------|
| C | 4.26632100  | -0.05501400 | -0.55420800 |
| H | 5.96759300  | 1.16661600  | -0.07047800 |
| H | 4.57145400  | 1.40700600  | 1.00862100  |
| C | 4.87714500  | 1.24422200  | -0.03234500 |
| H | 4.56550800  | 2.10818400  | -0.62763900 |
| N | 4.63600900  | -1.15449100 | 0.26307500  |
| H | 4.60652800  | -2.09481800 | -0.09330100 |
| H | 4.59324100  | -0.20679800 | -1.59424000 |
| C | 2.76632300  | 0.17381500  | -0.62118800 |
| O | 2.00049400  | -0.18742000 | 0.28272900  |
| O | 2.25731300  | 0.81500100  | -1.64843700 |
| H | 5.01654500  | -0.99021300 | 1.18068300  |
| H | 2.92662500  | 1.03358700  | -2.32280700 |
| C | -3.94573200 | 0.47093200  | 0.77016800  |
| H | -3.80897200 | 2.15933100  | 2.11125000  |
| H | -5.17071700 | 2.23472800  | 0.96233500  |
| C | -4.12283600 | 1.94247700  | 1.08334200  |
| H | -3.51740400 | 2.54061300  | 0.39813300  |
| N | -4.82101000 | -0.33827400 | 1.66818400  |
| H | -5.80167200 | -0.06177300 | 1.55886300  |

|    |             |             |             |
|----|-------------|-------------|-------------|
| H  | -4.55729400 | -0.20206700 | 2.65057500  |
| C  | -2.50875900 | 0.02249900  | 0.96711900  |
| O  | -2.19537400 | -0.73611000 | 1.88887700  |
| O  | -1.70092600 | 0.52912900  | 0.10316200  |
| H  | -4.74439500 | -1.34004200 | 1.46673900  |
| H  | -4.25223700 | 0.24743400  | -0.25638200 |
| Cu | 0.11143100  | 0.14198300  | 0.23391800  |

**R-allo-I4<sup>b</sup>**

|    |             |             |             |
|----|-------------|-------------|-------------|
| C  | 4.26123800  | -0.07499400 | -0.63440400 |
| H  | 5.99361000  | 1.07320000  | -0.09093300 |
| H  | 4.55489100  | 1.43408500  | 0.89266100  |
| C  | 4.90868300  | 1.21467700  | -0.12247700 |
| H  | 4.68912900  | 2.07231200  | -0.76847600 |
| N  | 4.53281900  | -1.25272300 | 0.17146200  |
| H  | 5.53557800  | -1.42323500 | 0.13737300  |
| H  | 4.60452400  | -0.26452700 | -1.65932000 |
| C  | 2.78284100  | 0.16893100  | -0.70213000 |
| O  | 2.02368000  | -0.20483400 | 0.20306400  |
| O  | 2.27542600  | 0.85130800  | -1.70109100 |
| H  | 4.31519500  | -1.04239600 | 1.14527100  |
| H  | 2.93480500  | 1.07134100  | -2.38434400 |
| C  | -3.91389400 | 0.47837000  | 0.78219400  |
| H  | -3.74107400 | 2.10955900  | 2.18851400  |
| H  | -5.11731600 | 2.24497700  | 1.06273500  |
| C  | -4.07097400 | 1.93787700  | 1.15700200  |
| H  | -3.46819400 | 2.55742200  | 0.48853400  |
| N  | -4.78218600 | -0.35704200 | 1.66251400  |
| H  | -5.76003400 | -0.05917300 | 1.59028200  |
| H  | -4.49155800 | -0.27166200 | 2.64312800  |
| C  | -2.47810700 | 0.01263800  | 0.94258800  |
| O  | -2.15154700 | -0.74942300 | 1.85681000  |
| O  | -1.68407400 | 0.51296400  | 0.06160500  |
| H  | -4.72945500 | -1.34942000 | 1.41261500  |
| H  | -4.23817800 | 0.29893500  | -0.24729200 |
| Cu | 0.13107100  | 0.12825900  | 0.17112200  |

**R-allo-T5<sup>b</sup>**

|   |            |            |             |
|---|------------|------------|-------------|
| C | 4.33069900 | 0.15262300 | -0.69481000 |
|---|------------|------------|-------------|

|    |             |             |             |
|----|-------------|-------------|-------------|
| H  | 6.06752800  | 1.09223200  | 0.12250300  |
| H  | 4.66729300  | 1.09937500  | 1.21734700  |
| C  | 4.98018400  | 1.20941900  | 0.17262200  |
| H  | 4.72563800  | 2.22085400  | -0.16401800 |
| N  | 4.57215400  | -1.23089400 | -0.27870800 |
| H  | 5.53740100  | -1.46615700 | -0.49770300 |
| H  | 4.67975300  | 0.25270000  | -1.72990100 |
| C  | 2.82917800  | 0.30021700  | -0.72854000 |
| O  | 2.20508800  | 0.75848100  | 0.23823100  |
| O  | 2.15373700  | -0.10327600 | -1.77667600 |
| H  | 4.48249300  | -1.28388300 | 0.73569400  |
| H  | 2.73135400  | -0.44579700 | -2.48330600 |
| C  | -3.61370600 | 1.75455300  | 1.19443400  |
| H  | -3.90584000 | 3.41779800  | -0.15340500 |
| H  | -5.31907800 | 2.34563100  | 0.02489500  |
| C  | -4.22677600 | 2.37606000  | -0.03999200 |
| H  | -3.92041300 | 1.81604900  | -0.92627000 |
| N  | -4.11192400 | 2.45551200  | 2.41526100  |
| H  | -5.12702800 | 2.34927700  | 2.50294400  |
| H  | -3.89859500 | 3.45826200  | 2.37139200  |
| C  | -2.09554400 | 1.78570500  | 1.22155400  |
| O  | -1.48911800 | 2.21218900  | 2.20915100  |
| O  | -1.54565700 | 1.30726900  | 0.15954900  |
| H  | -3.66872000 | 2.08536300  | 3.26214000  |
| H  | -3.92074900 | 0.70695700  | 1.29394400  |
| Cu | 0.30620500  | 1.04485200  | 0.21182800  |

**R-allo-15<sup>b</sup>**

|   |             |             |             |
|---|-------------|-------------|-------------|
| C | 4.31248300  | 0.45584100  | -0.59705600 |
| H | 6.12695900  | 0.59120800  | 0.53656500  |
| H | 4.91264700  | -0.49727500 | 1.24723800  |
| C | 5.05804900  | 0.45572900  | 0.72516400  |
| H | 4.71472900  | 1.26652300  | 1.37407000  |
| N | 4.68917700  | -0.61638300 | -1.51351600 |
| H | 5.28195000  | -0.27072800 | -2.26088500 |
| H | 4.45895800  | 1.42408000  | -1.09677600 |
| C | 2.81780600  | 0.36952900  | -0.39126800 |
| O | 2.21299500  | 1.09117200  | 0.42083400  |
| O | 2.18204800  | -0.48379000 | -1.13735500 |
| H | 5.19683500  | -1.34790200 | -1.02109400 |
| H | 2.91264500  | -0.92327000 | -1.67284600 |
| C | -3.65902100 | 1.82594000  | 1.28890600  |

|    |             |            |             |
|----|-------------|------------|-------------|
| H  | -4.03593900 | 2.83812200 | -0.58199900 |
| H  | -5.39069300 | 1.84184300 | 0.01059800  |
| C  | -4.30137500 | 1.90122600 | -0.07885200 |
| H  | -3.96144600 | 1.06411900 | -0.69253400 |
| N  | -4.19814000 | 2.91427200 | 2.15761100  |
| H  | -5.20820000 | 2.80158800 | 2.28687600  |
| H  | -4.03305000 | 3.83353300 | 1.73319900  |
| C  | -2.14606700 | 1.94847700 | 1.25428700  |
| O  | -1.55976400 | 2.79824300 | 1.93172000  |
| O  | -1.57607500 | 1.08958300 | 0.48097400  |
| H  | -3.74949000 | 2.91706100 | 3.07902800  |
| H  | -3.90802000 | 0.88101900 | 1.78509600  |
| Cu | 0.29555900  | 1.10161000 | 0.46217400  |

**R-allo-T6<sup>b</sup>**

|    |             |             |             |
|----|-------------|-------------|-------------|
| C  | 4.31135000  | 0.17939300  | -0.38640500 |
| H  | 6.10549500  | 1.23852100  | 0.13434400  |
| H  | 4.67473700  | 1.73038200  | 1.07257400  |
| C  | 5.03006300  | 1.43037400  | 0.07951700  |
| H  | 4.85930200  | 2.25631100  | -0.61664200 |
| N  | 4.42265800  | -0.95313400 | 0.54325500  |
| H  | 4.89737800  | -1.74944400 | 0.12757900  |
| H  | 4.66594900  | -0.11247600 | -1.38231600 |
| C  | 2.81595800  | 0.40824400  | -0.50976800 |
| O  | 2.33564600  | 1.31709600  | -1.21727400 |
| O  | 2.10988100  | -0.42124900 | 0.17514400  |
| H  | 4.90785000  | -0.69253500 | 1.39920400  |
| H  | 2.93607200  | -0.99206400 | 0.60791900  |
| C  | -3.50058900 | 2.52306100  | -2.08310900 |
| H  | -3.81410400 | 1.16505800  | -3.73362500 |
| H  | -5.21638800 | 1.35077600  | -2.64818500 |
| C  | -4.12462900 | 1.28396700  | -2.68892300 |
| H  | -3.81185300 | 0.40082900  | -2.12685100 |
| N  | -3.98900600 | 3.73406000  | -2.80722600 |
| H  | -5.00788100 | 3.81072700  | -2.73236800 |
| H  | -3.74227200 | 3.68603900  | -3.80214600 |
| C  | -1.98518200 | 2.50667300  | -2.15518700 |
| O  | -1.37288300 | 3.32735000  | -2.84541700 |
| O  | -1.44313700 | 1.57793100  | -1.44558000 |
| H  | -3.57185700 | 4.59067900  | -2.42956200 |
| H  | -3.79966700 | 2.64139700  | -1.03665100 |
| Cu | 0.42934600  | 1.53069200  | -1.40562200 |



R-allo-16<sup>b</sup>

|    |             |             |             |
|----|-------------|-------------|-------------|
| C  | 4.20721300  | 0.17257400  | -0.40925500 |
| H  | 6.03597400  | 1.16483800  | 0.14766700  |
| H  | 4.60203000  | 1.71125000  | 1.05551300  |
| C  | 4.96724700  | 1.38956000  | 0.07318300  |
| H  | 4.83704600  | 2.21049200  | -0.63561800 |
| N  | 4.46384500  | -0.97449300 | 0.51146600  |
| H  | 5.46061300  | -1.21125700 | 0.52366900  |
| H  | 4.55508600  | -0.13824200 | -1.40015700 |
| C  | 2.70853300  | 0.40062900  | -0.47821700 |
| O  | 2.36143400  | 1.34501000  | -1.28088600 |
| O  | 1.92989100  | -0.28570500 | 0.19387700  |
| H  | 4.17999200  | -0.74158500 | 1.46985100  |
| H  | 3.93534700  | -1.80630800 | 0.23142300  |
| C  | -3.45847000 | 2.55640100  | -2.07074200 |
| H  | -3.81760900 | 1.10239000  | -3.62848200 |
| H  | -5.18637600 | 1.34938500  | -2.51293600 |
| C  | -4.09605900 | 1.28284700  | -2.58363600 |
| H  | -3.76327000 | 0.43501800  | -1.98019600 |
| N  | -3.97539200 | 3.72172600  | -2.84811200 |
| H  | -4.99084400 | 3.80420000  | -2.74016000 |
| H  | -3.76699700 | 3.61173900  | -3.84689500 |
| C  | -1.94464600 | 2.54079600  | -2.18135600 |
| O  | -1.35508300 | 3.33407400  | -2.92318600 |
| O  | -1.38418600 | 1.64778600  | -1.44449100 |
| H  | -3.54409600 | 4.59908100  | -2.54128400 |
| H  | -3.72810800 | 2.73367800  | -1.02448100 |
| Cu | 0.49511700  | 1.59575200  | -1.41906600 |

R-allo-T7<sup>b</sup>

|   |            |             |             |
|---|------------|-------------|-------------|
| C | 4.30866800 | 0.09096000  | -0.36926200 |
| H | 6.04780500 | 1.29818200  | 0.00707300  |
| H | 4.56647000 | 1.88239300  | 0.81066100  |
| C | 4.96677700 | 1.42728900  | -0.10224200 |
| H | 4.78270900 | 2.10194500  | -0.94136100 |
| N | 4.62068700 | -0.86040500 | 0.73808400  |
| H | 5.63308500 | -1.00271900 | 0.81185100  |
| H | 4.69786600 | -0.35952900 | -1.28927200 |

|    |             |             |             |
|----|-------------|-------------|-------------|
| C  | 2.81169200  | 0.19453600  | -0.50618900 |
| O  | 2.33486200  | 1.02919800  | -1.34142400 |
| O  | 2.03938400  | -0.52364800 | 0.17698000  |
| H  | 4.28752700  | -0.49400700 | 1.63753000  |
| H  | 4.17631500  | -1.77239400 | 0.59269000  |
| C  | -3.45844200 | 0.68626200  | -0.72550300 |
| H  | -3.74730200 | -0.51733800 | -2.49631000 |
| H  | -5.07397400 | -0.61426400 | -1.30722700 |
| C  | -3.98837700 | -0.54794300 | -1.42737900 |
| H  | -3.53708000 | -1.44173200 | -0.98991800 |
| N  | -4.11109100 | 1.90426700  | -1.29024800 |
| H  | -5.12723600 | 1.85104300  | -1.16730400 |
| H  | -3.91477700 | 1.98999100  | -2.29424600 |
| C  | -1.96452600 | 0.81194200  | -0.88810500 |
| O  | -1.44698600 | 1.70829700  | -1.58447100 |
| O  | -1.24475200 | -0.06679900 | -0.29806100 |
| H  | -3.77595400 | 2.75985800  | -0.83594700 |
| H  | -3.69559800 | 0.66389700  | 0.34273200  |
| Cu | 0.47930500  | 0.54681800  | -0.89720100 |

**R-allo-A·Cu(II)<sup>b</sup>**

|   |             |             |             |
|---|-------------|-------------|-------------|
| C | 4.43295500  | 0.30663200  | -0.50622600 |
| H | 6.10392200  | 1.63848200  | -0.27127200 |
| H | 4.74165700  | 1.97498500  | 0.83054700  |
| C | 5.01356100  | 1.66673600  | -0.18525200 |
| H | 4.63023400  | 2.40586400  | -0.89249500 |
| N | 4.99294500  | -0.71952700 | 0.42140400  |
| H | 6.00735300  | -0.79482600 | 0.29407100  |
| H | 4.70672700  | -0.00370200 | -1.52109200 |
| C | 2.93113700  | 0.27966300  | -0.41891400 |
| O | 2.25497800  | 1.10794000  | -1.09570300 |
| O | 2.32872200  | -0.56502200 | 0.30612400  |
| H | 4.81695800  | -0.46589600 | 1.40049900  |
| H | 4.57993900  | -1.64382200 | 0.26101500  |
| C | -3.27692800 | 0.08105200  | -0.26435400 |
| H | -3.49532100 | -1.36327800 | -1.85689300 |
| H | -4.88850100 | -1.26063900 | -0.74679400 |
| C | -3.79668700 | -1.23229300 | -0.81149800 |
| H | -3.39426500 | -2.05957300 | -0.22200900 |
| N | -3.86049300 | 1.21953500  | -1.03268500 |
| H | -4.88141600 | 1.22082400  | -0.94048200 |
| H | -3.63182600 | 1.14508500  | -2.03074700 |

|    |             |             |             |
|----|-------------|-------------|-------------|
| C  | -1.77611800 | 0.15778100  | -0.32799000 |
| O  | -1.18518300 | 1.01998300  | -1.04090000 |
| O  | -1.08968600 | -0.66914800 | 0.34100800  |
| H  | -3.50820900 | 2.12296500  | -0.69913300 |
| H  | -3.57819500 | 0.21566400  | 0.77989800  |
| Cu | 0.57763600  | 0.22704200  | -0.37438600 |

**Pathway c**

**S-A<sub>2</sub>·Cu(II)**

|    |             |             |             |
|----|-------------|-------------|-------------|
| C  | -3.73327800 | -0.22925800 | -0.18241400 |
| H  | -3.99332500 | 0.20290300  | 1.91878200  |
| H  | -5.19671600 | 0.96676300  | 0.84563200  |
| C  | -4.14305400 | 0.69056900  | 0.94884300  |
| H  | -3.54175900 | 1.60201900  | 0.91693100  |
| N  | -4.59702000 | -1.44659000 | -0.18409300 |
| H  | -5.57992200 | -1.18236300 | -0.30729200 |
| H  | -4.51772600 | -1.95268900 | 0.70565300  |
| C  | -2.29347900 | -0.65350000 | -0.07267800 |
| O  | -1.97815400 | -1.87932800 | -0.01703100 |
| O  | -1.38475300 | 0.22378300  | -0.01361800 |
| H  | -4.34131200 | -2.09576300 | -0.93506800 |
| H  | -3.87162300 | 0.25931900  | -1.15321400 |
| C  | 3.65771500  | -2.34157300 | 0.66505100  |
| H  | 4.07235600  | -2.28714800 | -1.45525000 |
| H  | 5.51291300  | -2.15870100 | -0.41006200 |
| C  | 4.46553400  | -1.86310100 | -0.52436500 |
| H  | 4.41777100  | -0.77340200 | -0.58603000 |
| N  | 3.76598000  | -3.82511900 | 0.78572200  |
| H  | 4.74845900  | -4.10024900 | 0.88696800  |
| H  | 3.39311900  | -4.28799600 | -0.05149100 |
| C  | 2.20734800  | -1.96248500 | 0.53679000  |
| O  | 1.30004700  | -2.84177600 | 0.46473300  |
| O  | 1.89206900  | -0.73819000 | 0.47388100  |
| H  | 3.24757300  | -4.18284800 | 1.59433900  |
| H  | 4.04385100  | -1.91614400 | 1.59705600  |
| Cu | -0.04188800 | -1.30621800 | 0.22374000  |

S-T1<sup>c</sup>

|    |             |             |             |
|----|-------------|-------------|-------------|
| C  | -3.64397500 | -0.25350400 | -0.16971300 |
| H  | -3.85443600 | 0.22005400  | 1.92755700  |
| H  | -5.11228800 | 0.92349200  | 0.87641100  |
| C  | -4.04774900 | 0.68119200  | 0.95200500  |
| H  | -3.47568400 | 1.60926700  | 0.88208700  |
| N  | -4.47394000 | -1.49261700 | -0.11335800 |
| H  | -5.46728300 | -1.25976300 | -0.21120200 |
| H  | -4.34831000 | -1.97401800 | 0.78427600  |
| C  | -2.18982300 | -0.64659500 | -0.08305600 |
| O  | -1.84206500 | -1.82955200 | 0.10479400  |
| O  | -1.32731000 | 0.29427400  | -0.18880100 |
| H  | -4.22187700 | -2.15299100 | -0.85556500 |
| H  | -3.82452500 | 0.20569900  | -1.14728400 |
| C  | 4.11858700  | -0.51325800 | 0.62563000  |
| H  | 4.63133400  | -0.32076600 | -1.46516700 |
| H  | 5.90977100  | 0.19527700  | -0.33289600 |
| C  | 4.83077000  | 0.18526700  | -0.51382400 |
| H  | 4.48274700  | 1.21824700  | -0.58510500 |
| N  | 4.63656400  | -1.90535000 | 0.77249400  |
| H  | 5.64209300  | -1.88760000 | 0.97202600  |
| H  | 4.49579500  | -2.44364000 | -0.09008600 |
| C  | 2.62792100  | -0.55363400 | 0.42030300  |
| O  | 2.00096200  | -1.66218900 | 0.42340600  |
| O  | 1.99797600  | 0.51859000  | 0.23300000  |
| H  | 4.16828300  | -2.40812900 | 1.53334900  |
| H  | 4.31155600  | -0.00345500 | 1.57621000  |
| Cu | 0.27625400  | -0.74266600 | 0.08728600  |

S-II<sup>c</sup>

|   |             |             |             |
|---|-------------|-------------|-------------|
| C | -4.09149700 | -0.10533700 | -0.19521900 |
| H | -4.37286900 | 0.32287300  | 1.90417100  |
| H | -5.59602900 | 1.04813600  | 0.82838500  |
| C | -4.53409400 | 0.80352200  | 0.93208500  |
| H | -3.96243000 | 1.73383100  | 0.90232800  |
| N | -4.93340000 | -1.33785400 | -0.20244000 |
| H | -5.92083400 | -1.09638400 | -0.33102800 |
| H | -4.84252800 | -1.84390400 | 0.68553200  |
| C | -2.63518500 | -0.52012700 | -0.07752700 |
| O | -2.32000200 | -1.70937800 | 0.03777800  |
| O | -1.81972000 | 0.47220300  | -0.10581100 |

|    |             |             |             |
|----|-------------|-------------|-------------|
| H  | -4.65480800 | -1.97968300 | -0.95077500 |
| H  | -4.23671400 | 0.37926300  | -1.16666100 |
| C  | 4.13858900  | 0.41924600  | 0.20718500  |
| H  | 4.57783800  | -0.19955700 | -1.81558400 |
| H  | 6.00436800  | 0.28190800  | -0.85990900 |
| C  | 4.95290000  | 0.50670700  | -1.06567000 |
| H  | 4.89005500  | 1.51796300  | -1.47396200 |
| N  | 4.28825500  | -0.94625100 | 0.79871700  |
| H  | 5.27366400  | -1.13903600 | 1.00430600  |
| H  | 3.95419300  | -1.66483200 | 0.14758300  |
| C  | 2.66979900  | 0.73030900  | -0.02789500 |
| O  | 1.84797000  | -0.20563100 | 0.29164500  |
| O  | 2.36282000  | 1.83123700  | -0.49530100 |
| H  | 3.75154600  | -1.04421600 | 1.66562600  |
| H  | 4.51211000  | 1.12383200  | 0.95783100  |
| Cu | 0.00874000  | 0.11283000  | 0.05284900  |

**S-T2<sup>c</sup>**

|   |             |             |             |
|---|-------------|-------------|-------------|
| C | -4.52640800 | 0.36020800  | -0.24700200 |
| H | -4.46267700 | 1.18051200  | 1.75038300  |
| H | -5.55327900 | 2.03078700  | 0.62959300  |
| C | -4.58575000 | 1.52838100  | 0.71783900  |
| H | -3.79648100 | 2.25257900  | 0.49741200  |
| N | -5.49910300 | -0.70195600 | 0.04427400  |
| H | -6.15945600 | -0.83996000 | -0.71534900 |
| H | -6.01798200 | -0.51358400 | 0.89938900  |
| C | -3.18302700 | -0.34421300 | -0.18642400 |
| O | -3.27265500 | -1.60264300 | 0.06733100  |
| O | -2.10657500 | 0.25624900  | -0.37150400 |
| H | -4.36070700 | -1.65667000 | 0.15319400  |
| H | -4.64837100 | 0.71301700  | -1.27814400 |
| C | 3.41121400  | -2.20115400 | -0.30252400 |
| H | 3.97273300  | -1.53475600 | -2.27950800 |
| H | 5.28165400  | -2.32900300 | -1.36440800 |
| C | 4.42335300  | -1.65424200 | -1.28726300 |
| H | 4.78010300  | -0.68014800 | -0.94429800 |
| N | 2.96904900  | -3.55811500 | -0.74626400 |
| H | 3.77094200  | -4.19448200 | -0.79651400 |
| H | 2.53936300  | -3.51725900 | -1.67698500 |
| C | 2.21673400  | -1.27745100 | -0.15478100 |
| O | 1.08441300  | -1.75844100 | -0.54177100 |
| O | 2.39303300  | -0.14668400 | 0.30518600  |
| H | 2.27834300  | -3.96040000 | -0.10589100 |

|    |             |             |             |
|----|-------------|-------------|-------------|
| H  | 3.85932200  | -2.32891300 | 0.68823500  |
| Cu | -0.43395700 | -0.69150600 | -0.37452800 |

**S-12<sup>c</sup>**

|    |             |             |             |
|----|-------------|-------------|-------------|
| C  | -4.17543100 | -0.09381000 | -0.19979400 |
| H  | -4.49408200 | 0.37268000  | 1.88727900  |
| H  | -5.63345900 | 1.15155800  | 0.76440600  |
| C  | -4.58928200 | 0.85971900  | 0.90949500  |
| H  | -3.97190000 | 1.76240500  | 0.90653400  |
| N  | -4.92584700 | -1.34570300 | -0.21628200 |
| H  | -5.52931500 | -1.41827400 | 0.59874500  |
| H  | -3.31029200 | -2.16195200 | -0.11562400 |
| C  | -2.70892500 | -0.44241700 | -0.07856600 |
| O  | -2.41399200 | -1.70768700 | -0.05228300 |
| O  | -1.82961900 | 0.43202600  | -0.01719600 |
| H  | -5.50485400 | -1.42098900 | -1.04609800 |
| H  | -4.26658800 | 0.41429200  | -1.16932500 |
| C  | 4.15835300  | 0.41519400  | 0.21112500  |
| H  | 4.54010200  | -0.21644700 | -1.81980800 |
| H  | 5.98991500  | 0.29677200  | -0.91684600 |
| C  | 4.92873600  | 0.50258100  | -1.08924100 |
| H  | 4.83580600  | 1.50910300  | -1.50389300 |
| N  | 4.33697000  | -0.94570900 | 0.80434400  |
| H  | 5.33139600  | -1.13504500 | 0.96580300  |
| H  | 3.97502200  | -1.66970300 | 0.17447700  |
| C  | 2.68277100  | 0.71397700  | 0.01377900  |
| O  | 1.87984700  | -0.25802400 | 0.27879800  |
| O  | 2.34741400  | 1.83293400  | -0.38265700 |
| H  | 3.84313000  | -1.03837400 | 1.69703000  |
| H  | 4.54860400  | 1.12788600  | 0.94495300  |
| Cu | 0.04971300  | 0.06621700  | 0.09171600  |

**S-T3m<sup>c</sup>**

|   |             |             |             |
|---|-------------|-------------|-------------|
| C | -4.15397000 | 0.02680100  | -0.30692200 |
| H | -4.58292200 | -0.11722600 | 1.81745800  |
| H | -5.65642500 | 0.96846400  | 0.90361600  |
| C | -4.62005100 | 0.63489200  | 1.01950500  |
| H | -4.00640700 | 1.49466900  | 1.31040700  |
| N | -4.93936100 | -1.10768200 | -0.76680800 |
| H | -5.09263200 | -1.74232200 | 0.01637500  |
| H | -2.25655700 | -2.24391200 | -0.33948000 |
| C | -2.72184000 | -0.36641900 | -0.12532300 |

|    |             |             |             |
|----|-------------|-------------|-------------|
| O  | -2.46576700 | -1.58805500 | 0.34876100  |
| O  | -1.81615800 | 0.45376800  | -0.27944100 |
| H  | -5.85782000 | -0.75957300 | -1.03290800 |
| H  | -4.16460000 | 0.80484600  | -1.07796200 |
| C  | 4.17127000  | 0.44889700  | 0.16421700  |
| H  | 4.46159800  | -0.40349100 | -1.79962500 |
| H  | 5.95396900  | 0.17917600  | -1.01612300 |
| C  | 4.88942400  | 0.38390000  | -1.16784600 |
| H  | 4.79201700  | 1.34130300  | -1.68506200 |
| N  | 4.35899400  | -0.84422900 | 0.89117700  |
| H  | 5.35697900  | -1.02944200 | 1.03449900  |
| H  | 3.96620100  | -1.62487100 | 0.35382800  |
| C  | 2.69347800  | 0.74569800  | -0.01856100 |
| O  | 1.89056500  | -0.20026300 | 0.32913600  |
| O  | 2.35643400  | 1.83351300  | -0.49210900 |
| H  | 3.89963800  | -0.83758100 | 1.80700200  |
| H  | 4.59767000  | 1.23022600  | 0.80132200  |
| Cu | 0.06373600  | 0.09764100  | 0.04337000  |

**S-T3n<sup>c</sup>**

|   |             |             |             |
|---|-------------|-------------|-------------|
| C | -4.20600500 | -0.27589000 | -0.15016500 |
| H | -4.23921800 | 1.31306800  | 1.31314200  |
| H | -5.58125200 | 1.33337500  | 0.14918400  |
| C | -4.50817200 | 1.14930400  | 0.26269800  |
| H | -3.96765200 | 1.87599100  | -0.35273500 |
| N | -4.92504700 | -1.30482600 | 0.59501400  |
| H | -4.93924100 | -1.04195900 | 1.57942500  |
| H | -2.24665700 | -2.44917800 | 0.20010500  |
| C | -2.73734800 | -0.59071400 | -0.10817900 |
| O | -2.36196300 | -1.80648800 | -0.52028300 |
| O | -1.89149300 | 0.25398200  | 0.18683600  |
| H | -5.89292400 | -1.30662800 | 0.28462700  |
| H | -4.45337100 | -0.41238900 | -1.21510400 |
| C | 4.10810600  | 0.31158200  | 0.37299200  |
| H | 4.48330300  | 0.40750500  | -1.75227800 |
| H | 5.92290700  | 0.66515800  | -0.73168600 |
| C | 4.85061300  | 0.86333100  | -0.82550900 |
| H | 4.70299800  | 1.94421700  | -0.88305500 |
| N | 4.35859100  | -1.15827700 | 0.48073700  |
| H | 5.36253200  | -1.34181700 | 0.57649900  |
| H | 4.02575500  | -1.64849500 | -0.35675100 |
| C | 2.61916600  | 0.59193400  | 0.29166600  |
| O | 1.85199000  | -0.44363500 | 0.26079500  |

|    |            |             |            |
|----|------------|-------------|------------|
| O  | 2.23351100 | 1.76288700  | 0.25640900 |
| H  | 3.87974500 | -1.56799100 | 1.28858000 |
| H  | 4.47946400 | 0.75911100  | 1.30079800 |
| Cu | 0.02206800 | -0.09555500 | 0.17859800 |

**S-13<sup>c</sup>**

|    |             |             |             |
|----|-------------|-------------|-------------|
| C  | -4.14998900 | -0.05535100 | -0.29748400 |
| H  | -4.58153800 | -0.00338600 | 1.82788800  |
| H  | -5.59675200 | 1.06448700  | 0.83028300  |
| C  | -4.58022200 | 0.68381200  | 0.97228900  |
| H  | -3.91960800 | 1.52866700  | 1.19577900  |
| N  | -5.00474900 | -1.17171500 | -0.66860000 |
| H  | -5.15740300 | -1.75897500 | 0.15094800  |
| H  | -1.62861300 | -1.94009600 | 0.46040600  |
| C  | -2.73219800 | -0.49343600 | -0.08980600 |
| O  | -2.56779400 | -1.73356800 | 0.29029600  |
| O  | -1.80163800 | 0.31704200  | -0.21648400 |
| H  | -5.91592300 | -0.78927700 | -0.91192400 |
| H  | -4.12047200 | 0.65715300  | -1.12953900 |
| C  | 4.18047600  | 0.45326800  | 0.17338500  |
| H  | 4.48771100  | -0.36316800 | -1.80316800 |
| H  | 5.96668200  | 0.24477900  | -1.01334800 |
| C  | 4.89720200  | 0.42526300  | -1.16070500 |
| H  | 4.77532400  | 1.38744300  | -1.66370500 |
| N  | 4.40284700  | -0.84454500 | 0.88169300  |
| H  | 5.40527900  | -1.00426900 | 1.02460200  |
| H  | 4.03296300  | -1.62785000 | 0.33216800  |
| C  | 2.69518000  | 0.71468400  | -0.00123900 |
| O  | 1.91557600  | -0.25134000 | 0.34378400  |
| O  | 2.32910100  | 1.79717100  | -0.46568400 |
| H  | 3.94183400  | -0.86334900 | 1.79651000  |
| H  | 4.58829700  | 1.23633300  | 0.82054800  |
| Cu | 0.08252700  | 0.01539800  | 0.07019500  |

**S-T4<sup>c</sup>**

|   |             |             |             |
|---|-------------|-------------|-------------|
| C | -4.05132600 | 0.05034800  | -0.00627000 |
| H | -4.98957700 | -0.60822700 | -1.82247900 |
| H | -5.33714200 | -1.61422400 | -0.40196700 |
| C | -4.55971500 | -1.02518700 | -0.90039700 |
| H | -3.75067500 | -1.70735400 | -1.17480400 |
| N | -5.11372400 | 0.89858700  | 0.67762000  |



|    |             |             |             |
|----|-------------|-------------|-------------|
| H  | -6.04723800 | 0.62423000  | 0.38434900  |
| H  | -4.93389700 | 1.90050000  | 0.65983500  |
| C  | -2.78758100 | 0.63208200  | -0.12716700 |
| O  | -2.59938000 | 1.79056500  | 0.52247600  |
| O  | -1.84928500 | 0.09047900  | -0.79304500 |
| H  | -1.68617700 | 2.10150600  | 0.40470900  |
| H  | -4.37088700 | 0.04969200  | 1.22773300  |
| C  | 4.17314600  | 0.20786200  | -0.51429500 |
| H  | 4.45414500  | -1.22094100 | 1.08195100  |
| H  | 5.96078500  | -0.67399200 | 0.29972900  |
| C  | 4.91461000  | -0.94527800 | 0.12611300  |
| H  | 4.88955500  | -1.81201200 | -0.53836100 |
| N  | 4.27503000  | 1.41400700  | 0.36325100  |
| H  | 5.25748700  | 1.67152200  | 0.50066300  |
| H  | 3.86374900  | 1.23111300  | 1.28482200  |
| C  | 2.71632000  | -0.12579800 | -0.78787400 |
| O  | 2.45491200  | -1.08906400 | -1.51427200 |
| O  | 1.85399900  | 0.64842400  | -0.22744800 |
| H  | 3.78363800  | 2.21779000  | -0.03890500 |
| H  | 4.63367900  | 0.48252400  | -1.46949700 |
| Cu | 0.00758500  | 0.35221900  | -0.50862100 |

**14<sup>c</sup>**

|   |             |             |             |
|---|-------------|-------------|-------------|
| C | -3.62831600 | -0.46972500 | 0.27992400  |
| H | -4.49748300 | 1.40279600  | 0.73253600  |
| H | -2.96598900 | 1.49095900  | -0.13757400 |
| C | -3.50343400 | 0.94008800  | 0.64816200  |
| H | -2.97244400 | 1.05165800  | 1.59388600  |
| N | -4.29578500 | -0.76445700 | -0.97260500 |
| H | -4.40580200 | -1.77317200 | -1.13806500 |
| H | -2.92909900 | -3.46880100 | 1.06301300  |
| C | -3.12336400 | -1.57488000 | 1.04634400  |
| O | -3.30734000 | -2.76693700 | 0.49626900  |
| O | -2.55944200 | -1.38831800 | 2.13539400  |
| H | -5.23279900 | -0.33461800 | -0.99489200 |
| H | -3.77511700 | -0.36900000 | -1.77076200 |
| C | -0.13408200 | -5.09886500 | 6.25085200  |
| H | 1.87274800  | -5.03655900 | 5.45447100  |
| H | 1.72059400  | -5.90505000 | 7.00417600  |
| C | 1.36820400  | -5.04335700 | 6.42806900  |
| H | 1.64075000  | -4.13389100 | 6.96887200  |
| N | -0.50104900 | -6.37607700 | 5.56392100  |
| H | -0.18876700 | -7.18281300 | 6.11275000  |
| H | -0.05924700 | -6.42700500 | 4.63982100  |

|    |             |             |            |
|----|-------------|-------------|------------|
| C  | -0.65625600 | -3.90888000 | 5.45740900 |
| O  | -1.17771000 | -4.17922600 | 4.32286100 |
| O  | -0.52718000 | -2.78416200 | 5.96597600 |
| H  | -1.51242400 | -6.45200300 | 5.42259800 |
| H  | -0.64078800 | -5.11257400 | 7.22103700 |
| Cu | -1.86168000 | -2.75163400 | 3.26864600 |

**R-allo-T5<sup>c</sup>**

|    |             |             |             |
|----|-------------|-------------|-------------|
| C  | -3.71904600 | -0.46712900 | 0.43648700  |
| H  | -3.95593000 | 1.65736800  | 0.31442800  |
| H  | -2.36175000 | 1.07039400  | -0.20046600 |
| C  | -3.17666600 | 0.91604300  | 0.52169300  |
| H  | -2.79015200 | 1.11354100  | 1.52512000  |
| N  | -4.52506700 | -0.78278200 | -0.81782300 |
| H  | -4.27935200 | -1.65807200 | -1.27574900 |
| H  | -3.15200400 | -3.47962500 | 1.20889000  |
| C  | -3.16092700 | -1.56314700 | 1.09757100  |
| O  | -3.51832600 | -2.77526400 | 0.64866700  |
| O  | -2.37906500 | -1.42464200 | 2.09160700  |
| H  | -4.97839500 | -0.66561300 | 0.33927200  |
| H  | -4.56457600 | 0.02447100  | -1.43343700 |
| C  | -0.60125800 | -4.86537500 | 6.63330100  |
| H  | 1.49394000  | -4.36726400 | 6.47278400  |
| H  | 1.06736700  | -5.32100900 | 7.91817600  |
| C  | 0.73692100  | -4.51824200 | 7.25142200  |
| H  | 0.64514900  | -3.59935100 | 7.83537200  |
| N  | -0.47851000 | -6.14856700 | 5.87650000  |
| H  | -0.17055300 | -6.90236200 | 6.49881600  |
| H  | 0.20967200  | -6.05919100 | 5.12108200  |
| C  | -1.09407000 | -3.76013900 | 5.71716800  |
| O  | -1.15846600 | -4.06170000 | 4.46693300  |
| O  | -1.37932200 | -2.66351300 | 6.20589900  |
| H  | -1.36791700 | -6.42611400 | 5.45062800  |
| H  | -1.35916700 | -5.02829400 | 7.40592100  |
| Cu | -1.79664900 | -2.75411500 | 3.29512700  |

**R-allo-15<sup>c</sup>**

|   |             |             |             |
|---|-------------|-------------|-------------|
| C | -4.11280600 | -0.37244200 | 0.57909700  |
| H | -4.66816400 | 1.51195400  | -0.29129200 |
| H | -3.33836300 | 0.69274900  | -1.14382700 |
| C | -3.75618600 | 0.92186500  | -0.15532700 |

|    |             |             |             |
|----|-------------|-------------|-------------|
| H  | -3.03232400 | 1.52287500  | 0.40597600  |
| N  | -5.09037600 | -1.20797500 | -0.10028200 |
| H  | -4.82111400 | -1.30551100 | -1.07891200 |
| H  | -1.67372200 | -2.45652100 | 0.12290000  |
| C  | -2.83113800 | -1.11171700 | 0.81474300  |
| O  | -2.54287900 | -2.04598800 | -0.05404800 |
| O  | -2.08360600 | -0.79191500 | 1.75174200  |
| H  | -4.49602800 | -0.12202800 | 1.57449100  |
| H  | -5.97455700 | -0.70407100 | -0.10175700 |
| C  | 3.20277100  | -2.45906900 | 4.05184700  |
| H  | 4.31206800  | -1.14687100 | 2.74198300  |
| H  | 5.28925600  | -1.92045600 | 4.01757200  |
| C  | 4.31858900  | -1.46862300 | 3.79020200  |
| H  | 4.18834500  | -0.59059800 | 4.42738900  |
| N  | 3.42423400  | -3.67962000 | 3.21764200  |
| H  | 4.32473000  | -4.11106800 | 3.44867200  |
| H  | 3.43424200  | -3.43973800 | 2.22008800  |
| C  | 1.84616200  | -1.84954000 | 3.74708800  |
| O  | 1.23586400  | -2.34268800 | 2.72471500  |
| O  | 1.43185700  | -0.92800100 | 4.45379300  |
| H  | 2.68856000  | -4.37839100 | 3.35963500  |
| H  | 3.20436700  | -2.78687700 | 5.09580600  |
| Cu | -0.39676900 | -1.58324100 | 2.23961200  |

**R-allo-T6m<sup>c</sup>**

|   |             |             |             |
|---|-------------|-------------|-------------|
| C | -4.10345800 | -0.20111900 | 0.72762300  |
| H | -4.63222500 | 1.45790600  | -0.52942700 |
| H | -3.52986300 | 0.29835700  | -1.30740200 |
| C | -3.76131200 | 0.81457000  | -0.36707100 |
| H | -2.90924900 | 1.44470100  | -0.08721600 |
| N | -5.22802900 | -1.07276500 | 0.41979100  |
| H | -5.11396700 | -1.43652200 | -0.52576700 |
| H | -2.13796100 | -1.83663100 | -0.65203500 |
| C | -2.86629100 | -1.01124500 | 0.94974200  |
| O | -2.65319600 | -2.05728900 | 0.14430600  |
| O | -2.06058700 | -0.73220100 | 1.83891300  |
| H | -4.30740100 | 0.32919400  | 1.66323700  |
| H | -6.06670300 | -0.49631100 | 0.40255900  |
| C | 3.16276700  | -2.56448600 | 3.94827800  |
| H | 4.36725800  | -0.90841100 | 3.25709200  |
| H | 5.16544700  | -1.95949800 | 4.45637500  |
| C | 4.21522000  | -1.49918500 | 4.16780400  |
| H | 3.89871000  | -0.83043100 | 4.97144900  |

|    |             |             |            |
|----|-------------|-------------|------------|
| N  | 3.62726800  | -3.51774400 | 2.89461400 |
| H  | 4.50258400  | -3.96604400 | 3.18376900 |
| H  | 3.79980000  | -3.03026100 | 2.00868700 |
| C  | 1.81772800  | -1.97153900 | 3.57345800 |
| O  | 1.31861900  | -2.36120500 | 2.44922700 |
| O  | 1.27969800  | -1.17343300 | 4.34589600 |
| H  | 2.93503600  | -4.25151300 | 2.71442200 |
| H  | 3.01543600  | -3.15745200 | 4.85747900 |
| Cu | -0.35694700 | -1.62259600 | 2.08608300 |

**R-allo-T6n<sup>c</sup>**

|    |             |             |             |
|----|-------------|-------------|-------------|
| C  | -4.13697600 | -0.30007000 | 0.67654900  |
| H  | -4.67705100 | 1.45701700  | -0.43262700 |
| H  | -3.37036400 | 0.51304300  | -1.18563700 |
| C  | -3.77017600 | 0.87756800  | -0.23123500 |
| H  | -3.03034300 | 1.53664800  | 0.23664500  |
| N  | -5.12649400 | -1.21138900 | 0.12276000  |
| H  | -4.88979900 | -1.40585200 | -0.84973800 |
| H  | -2.70851100 | -2.86601200 | 0.34591100  |
| C  | -2.86549500 | -1.03016600 | 0.97305500  |
| O  | -2.46301200 | -1.95713400 | 0.09981300  |
| O  | -2.14388800 | -0.69626300 | 1.91413600  |
| H  | -4.50311300 | 0.08660400  | 1.63330300  |
| H  | -6.02014400 | -0.72502200 | 0.10532600  |
| C  | 3.17867000  | -2.52620900 | 3.98770000  |
| H  | 4.35606700  | -1.01709200 | 2.98638600  |
| H  | 5.26047900  | -2.00515000 | 4.16430800  |
| C  | 4.30368100  | -1.51313600 | 3.96259600  |
| H  | 4.13551200  | -0.75677500 | 4.73278700  |
| N  | 3.44784200  | -3.58997300 | 2.97287700  |
| H  | 4.33391700  | -4.06259700 | 3.17706300  |
| H  | 3.51359100  | -3.18622400 | 2.03211500  |
| C  | 1.83116800  | -1.87883000 | 3.72428400  |
| O  | 1.23249500  | -2.26686400 | 2.65006600  |
| O  | 1.40233200  | -1.03912000 | 4.51866800  |
| H  | 2.70438700  | -4.29421500 | 2.95408100  |
| H  | 3.12524900  | -3.02802300 | 4.95927000  |
| Cu | -0.42389500 | -1.50289100 | 2.29786400  |

**R-allo-I6<sup>c</sup>**

|   |             |             |            |
|---|-------------|-------------|------------|
| C | -4.09912100 | -0.19165200 | 0.70316200 |
|---|-------------|-------------|------------|

|    |             |             |             |
|----|-------------|-------------|-------------|
| H  | -4.77257900 | 1.41462300  | -0.55282100 |
| H  | -3.59800100 | 0.33090500  | -1.33425600 |
| C  | -3.85971200 | 0.83302100  | -0.39493800 |
| H  | -3.05069800 | 1.51851800  | -0.12791900 |
| N  | -5.12560100 | -1.17347500 | 0.36487500  |
| H  | -5.48230700 | -1.01900600 | -0.57435300 |
| H  | -3.83815000 | -2.40948200 | 0.59532000  |
| C  | -2.82159400 | -0.95061400 | 0.98415000  |
| O  | -2.87798200 | -2.24193600 | 0.85398500  |
| O  | -1.77305200 | -0.37417200 | 1.31661100  |
| H  | -4.34824100 | 0.32543300  | 1.63912300  |
| H  | -5.90686500 | -1.13457600 | 1.01125400  |
| C  | 3.83027500  | -2.01636100 | 2.45083800  |
| H  | 4.72313700  | -1.08136700 | 0.71990400  |
| H  | 5.89151100  | -1.66884100 | 1.93290600  |
| C  | 4.91618500  | -1.19228100 | 1.79325000  |
| H  | 4.94935100  | -0.19948500 | 2.24803900  |
| N  | 3.82661900  | -3.39289800 | 1.86834100  |
| H  | 4.73799800  | -3.84032800 | 2.00688400  |
| H  | 3.63908200  | -3.36113400 | 0.86014900  |
| C  | 2.46296700  | -1.37685100 | 2.30017300  |
| O  | 1.58027500  | -2.07452600 | 1.67143600  |
| O  | 2.27391400  | -0.25349800 | 2.77477100  |
| H  | 3.10846800  | -3.98489100 | 2.29620800  |
| H  | 4.02460300  | -2.13260500 | 3.52240900  |
| Cu | -0.09293700 | -1.26316100 | 1.53575300  |

**R-allo-T7<sup>c</sup>**

|   |             |             |             |
|---|-------------|-------------|-------------|
| C | -4.09827400 | -0.17101400 | 0.71650700  |
| H | -4.85126200 | 1.40664000  | -0.53432500 |
| H | -3.61534000 | 0.38978100  | -1.31329800 |
| C | -3.91249400 | 0.86909400  | -0.37264000 |
| H | -3.14127400 | 1.59134000  | -0.09073200 |
| N | -5.05066600 | -1.22954700 | 0.35412500  |
| H | -5.43725700 | -1.08830600 | -0.57642600 |
| H | -3.94334500 | -2.21520100 | 0.49475300  |
| C | -2.80087500 | -0.91586200 | 0.97295200  |
| O | -2.88567400 | -2.18332600 | 0.77115000  |
| O | -1.76054100 | -0.33149500 | 1.33335000  |
| H | -4.38949200 | 0.30974700  | 1.65759700  |
| H | -5.81600400 | -1.30413000 | 1.01831500  |
| C | 3.83266300  | -2.01395500 | 2.45442200  |
| H | 4.73244400  | -1.14118100 | 0.69513700  |

|    |             |             |            |
|----|-------------|-------------|------------|
| H  | 5.89677800  | -1.71877300 | 1.91660500 |
| C  | 4.92982800  | -1.22731900 | 1.77001600 |
| H  | 4.98444500  | -0.22378100 | 2.19830500 |
| N  | 3.79997200  | -3.40417700 | 1.90588800 |
| H  | 4.70242700  | -3.86656100 | 2.05339700 |
| H  | 3.60927300  | -3.39429000 | 0.89787200 |
| C  | 2.47659100  | -1.35264100 | 2.29472700 |
| O  | 1.58098100  | -2.04603100 | 1.68075400 |
| O  | 2.30921400  | -0.21727900 | 2.74868700 |
| H  | 3.07127600  | -3.97032900 | 2.35085200 |
| H  | 4.03156300  | -2.10758200 | 3.52729200 |
| Cu | -0.08574300 | -1.22037200 | 1.53983600 |

**R-allo-17<sup>c</sup>**

|    |             |             |             |
|----|-------------|-------------|-------------|
| C  | -4.01391600 | -0.26295100 | 0.71857500  |
| H  | -4.85823700 | 1.35462000  | -0.43083400 |
| H  | -3.54239000 | 0.47790800  | -1.25500100 |
| C  | -3.89089300 | 0.86234100  | -0.28892100 |
| H  | -3.17518400 | 1.60461400  | 0.07236800  |
| N  | -5.03670700 | -1.24257700 | 0.24612100  |
| H  | -5.93819100 | -0.77941500 | 0.09727300  |
| H  | -4.74240900 | -1.66970800 | -0.63951500 |
| C  | -2.69690000 | -0.99512700 | 0.89858200  |
| O  | -2.54849500 | -2.14653200 | 0.47339500  |
| O  | -1.79366100 | -0.29662800 | 1.48858500  |
| H  | -4.35495400 | 0.11152400  | 1.68832800  |
| H  | -5.17185300 | -2.00185200 | 0.92075100  |
| C  | 3.82054600  | -1.95147900 | 2.46714400  |
| H  | 4.62355000  | -1.36758400 | 0.54854800  |
| H  | 5.85211400  | -1.81560500 | 1.76151900  |
| C  | 4.89235400  | -1.31165400 | 1.61003700  |
| H  | 5.00656600  | -0.26118500 | 1.88816800  |
| N  | 3.70432600  | -3.40032800 | 2.11783300  |
| H  | 4.59604800  | -3.87889300 | 2.27834600  |
| H  | 3.45401400  | -3.51718500 | 1.12981900  |
| C  | 2.48012200  | -1.26022100 | 2.29673400  |
| O  | 1.55152900  | -1.96192000 | 1.74905600  |
| O  | 2.36539400  | -0.08949700 | 2.67311400  |
| H  | 2.98299900  | -3.86759700 | 2.67537600  |
| H  | 4.08926000  | -1.90654400 | 3.52733000  |
| Cu | -0.11792200 | -1.12142300 | 1.61119600  |

**R-allo-T8<sup>c</sup>**

|    |             |             |             |
|----|-------------|-------------|-------------|
| C  | -2.18499300 | 2.67718000  | 1.97097800  |
| H  | -2.41961500 | 4.68001700  | 1.22432900  |
| H  | -1.91402200 | 3.49488000  | -0.00981400 |
| C  | -1.79588100 | 3.80102300  | 1.03569300  |
| H  | -0.75252900 | 4.07590000  | 1.20600900  |
| N  | -3.62862900 | 2.34154400  | 1.79192200  |
| H  | -4.21164600 | 3.15330300  | 2.01909800  |
| H  | -3.82273100 | 2.07691600  | 0.81912100  |
| C  | -1.36890600 | 1.42906400  | 1.76060000  |
| O  | -1.91066800 | 0.30695500  | 1.59244600  |
| O  | -0.09894600 | 1.52452900  | 1.76537200  |
| H  | -2.06051500 | 2.97978200  | 3.01705300  |
| H  | -3.91558800 | 1.55932800  | 2.38894600  |
| C  | 2.01681500  | -3.82059000 | 0.80805800  |
| H  | 2.35260600  | -3.63175200 | -1.31799000 |
| H  | 3.31088500  | -4.90832100 | -0.52130800 |
| C  | 2.90863100  | -3.89657800 | -0.41162700 |
| H  | 3.74521400  | -3.20342400 | -0.29752000 |
| N  | 0.90854600  | -4.81554500 | 0.69020000  |
| H  | 1.29049400  | -5.76449300 | 0.62623300  |
| H  | 0.34902900  | -4.64342200 | -0.15271100 |
| C  | 1.43938300  | -2.44340700 | 1.02474600  |
| O  | 0.17243900  | -2.31668500 | 1.16278000  |
| O  | 2.19635500  | -1.45384500 | 1.09192200  |
| H  | 0.27573800  | -4.77620100 | 1.49538400  |
| H  | 2.57506400  | -4.08427600 | 1.71387700  |
| Cu | 0.13061800  | -0.40440300 | 1.46960800  |

**R-allo-A·Cu(II)<sup>(a)</sup>**

|   |             |            |             |
|---|-------------|------------|-------------|
| C | -2.40249100 | 2.52456100 | 1.93562000  |
| H | -2.84096100 | 4.51203600 | 1.24288100  |
| H | -2.20212400 | 3.42380800 | -0.01845800 |
| C | -2.12570300 | 3.71025400 | 1.03640000  |
| H | -1.11840900 | 4.08771300 | 1.22719400  |
| N | -3.80036600 | 2.04496200 | 1.72518100  |
| H | -4.46712600 | 2.79092400 | 1.94967000  |
| H | -3.94933500 | 1.77367500 | 0.74627100  |
| C | -1.45114200 | 1.38488200 | 1.69034700  |
| O | -1.88086300 | 0.23551400 | 1.37032500  |

|    |             |             |             |
|----|-------------|-------------|-------------|
| O  | -0.20676100 | 1.57256400  | 1.80714700  |
| H  | -2.32061500 | 2.80671500  | 2.99103700  |
| H  | -4.01927300 | 1.23167800  | 2.30943200  |
| C  | 2.45388800  | -3.43313000 | 1.38327500  |
| H  | 3.33396600  | -3.10670300 | -0.56374400 |
| H  | 4.32346100  | -4.09051500 | 0.54813900  |
| C  | 3.64967400  | -3.23140800 | 0.47795800  |
| H  | 4.19708700  | -2.33868000 | 0.78902200  |
| N  | 1.73404300  | -4.68714500 | 1.01468200  |
| H  | 2.35199500  | -5.49702300 | 1.12898200  |
| H  | 1.43029700  | -4.66040300 | 0.03435800  |
| C  | 1.48477500  | -2.28273100 | 1.33736400  |
| O  | 0.24891100  | -2.46632200 | 1.14230200  |
| O  | 1.91689400  | -1.10484100 | 1.51393000  |
| H  | 0.90110600  | -4.83232900 | 1.59451500  |
| H  | 2.77179900  | -3.54931000 | 2.42590100  |
| Cu | 0.03147800  | -0.42297500 | 1.35608300  |

#### Pathway d

#### R-allo-A·Cu(II)<sup>(a)</sup>

|   |             |             |             |
|---|-------------|-------------|-------------|
| C | -2.40249100 | 2.52456100  | 1.93562000  |
| H | -2.84096100 | 4.51203600  | 1.24288100  |
| H | -2.20212400 | 3.42380800  | -0.01845800 |
| C | -2.12570300 | 3.71025400  | 1.03640000  |
| H | -1.11840900 | 4.08771300  | 1.22719400  |
| N | -3.80036600 | 2.04496200  | 1.72518100  |
| H | -4.46712600 | 2.79092400  | 1.94967000  |
| H | -3.94933500 | 1.77367500  | 0.74627100  |
| C | -1.45114200 | 1.38488200  | 1.69034700  |
| O | -1.88086300 | 0.23551400  | 1.37032500  |
| O | -0.20676100 | 1.57256400  | 1.80714700  |
| H | -2.32061500 | 2.80671500  | 2.99103700  |
| H | -4.01927300 | 1.23167800  | 2.30943200  |
| C | 2.45388800  | -3.43313000 | 1.38327500  |
| H | 3.33396600  | -3.10670300 | -0.56374400 |
| H | 4.32346100  | -4.09051500 | 0.54813900  |
| C | 3.64967400  | -3.23140800 | 0.47795800  |
| H | 4.19708700  | -2.33868000 | 0.78902200  |
| N | 1.73404300  | -4.68714500 | 1.01468200  |
| H | 2.35199500  | -5.49702300 | 1.12898200  |



|    |            |             |            |
|----|------------|-------------|------------|
| H  | 1.43029700 | -4.66040300 | 0.03435800 |
| C  | 1.48477500 | -2.28273100 | 1.33736400 |
| O  | 0.24891100 | -2.46632200 | 1.14230200 |
| O  | 1.91689400 | -1.10484100 | 1.51393000 |
| H  | 0.90110600 | -4.83232900 | 1.59451500 |
| H  | 2.77179900 | -3.54931000 | 2.42590100 |
| Cu | 0.03147800 | -0.42297500 | 1.35608300 |

R-allo-T1<sup>d</sup>

|    |             |             |             |
|----|-------------|-------------|-------------|
| C  | -2.59398400 | 2.37453200  | 1.90384600  |
| H  | -3.05824400 | 4.33682700  | 1.15565000  |
| H  | -2.34552100 | 3.24212900  | -0.05919600 |
| C  | -2.31543900 | 3.55045800  | 0.99185000  |
| H  | -1.32603900 | 3.95829500  | 1.21128500  |
| N  | -3.97243600 | 1.85744200  | 1.65540900  |
| H  | -4.66363100 | 2.59142500  | 1.84274000  |
| H  | -4.08245200 | 1.56625500  | 0.67699400  |
| C  | -1.60328000 | 1.25836200  | 1.71051700  |
| O  | -1.99785200 | 0.08863100  | 1.40149600  |
| O  | -0.37185800 | 1.48263300  | 1.85068600  |
| H  | -2.55516100 | 2.67815300  | 2.95564600  |
| H  | -4.19278000 | 1.04951900  | 2.24645100  |
| C  | 2.86174400  | -3.12738400 | 1.44890800  |
| H  | 3.71315200  | -2.68228200 | -0.48666500 |
| H  | 4.87466100  | -3.30762000 | 0.71392700  |
| C  | 4.00181100  | -2.66347700 | 0.57005700  |
| H  | 4.28041000  | -1.64240400 | 0.84030800  |
| N  | 2.52527100  | -4.54971000 | 1.14580500  |
| H  | 3.33111200  | -5.15358100 | 1.33637100  |
| H  | 2.27331200  | -4.66260200 | 0.15719600  |
| C  | 1.61218200  | -2.29347600 | 1.30812100  |
| O  | 0.48838500  | -2.80960200 | 1.13144700  |
| O  | 1.74454600  | -1.02608200 | 1.42224900  |
| H  | 1.73286800  | -4.87788600 | 1.70688800  |
| H  | 3.15106300  | -3.09527800 | 2.50586800  |
| Cu | -0.12207600 | -0.55556700 | 1.37046700  |

R-allo-I1<sup>d</sup>

|   |             |            |            |
|---|-------------|------------|------------|
| C | -2.55490800 | 2.80277600 | 1.09616800 |
|---|-------------|------------|------------|

|    |             |             |             |
|----|-------------|-------------|-------------|
| H  | -3.22212000 | 4.41057000  | -0.17624500 |
| H  | -2.06397200 | 3.29604200  | -0.94912700 |
| C  | -2.32380000 | 3.80666700  | -0.01426200 |
| H  | -1.50379700 | 4.47464900  | 0.26012000  |
| N  | -3.71233500 | 1.92725700  | 0.74029800  |
| H  | -4.55648100 | 2.49160000  | 0.60084800  |
| H  | -3.52633000 | 1.41422600  | -0.12833100 |
| C  | -1.31517100 | 1.96429200  | 1.34667000  |
| O  | -1.41473600 | 0.71207300  | 1.06038700  |
| O  | -0.30201000 | 2.52163300  | 1.78000400  |
| H  | -2.81898100 | 3.30698300  | 2.03126700  |
| H  | -3.90471400 | 1.23558600  | 1.47131300  |
| C  | 2.84299600  | -3.41900800 | 1.43290500  |
| H  | 3.58936900  | -3.09187100 | -0.56776500 |
| H  | 4.83103900  | -3.57895200 | 0.61566300  |
| C  | 3.92636700  | -2.98037700 | 0.46968000  |
| H  | 4.17511000  | -1.93139700 | 0.64651600  |
| N  | 2.55705600  | -4.87061400 | 1.23074500  |
| H  | 3.39931800  | -5.42951200 | 1.39767400  |
| H  | 2.24223100  | -5.04485900 | 0.26973900  |
| C  | 1.55113000  | -2.64750600 | 1.23630300  |
| O  | 0.52969200  | -3.21445300 | 0.83314800  |
| O  | 1.65053300  | -1.39458700 | 1.51495400  |
| H  | 1.81823600  | -5.20158400 | 1.85845700  |
| H  | 3.16899900  | -3.30322100 | 2.47140600  |
| Cu | 0.11833500  | -0.34238100 | 1.29155000  |

R-allo-T2<sup>d</sup>

|   |             |             |             |
|---|-------------|-------------|-------------|
| C | -2.56760000 | 2.80364600  | 1.08538300  |
| H | -3.35733400 | 4.45989600  | -0.04354100 |
| H | -2.20561500 | 3.44050800  | -0.94714500 |
| C | -2.43130300 | 3.88122900  | 0.03093700  |
| H | -1.62096700 | 4.56116200  | 0.30439500  |
| N | -3.71431000 | 1.91006300  | 0.73913600  |
| H | -4.58440200 | 2.45008500  | 0.69095700  |
| H | -3.56829000 | 1.46320700  | -0.17244300 |
| C | -1.29147700 | 1.99627800  | 1.23295000  |
| O | -1.38254900 | 0.74284000  | 0.94118800  |
| O | -0.26550400 | 2.56978000  | 1.60767700  |
| H | -2.79861000 | 3.24121900  | 2.06228100  |
| H | -3.83639100 | 1.16481100  | 1.43135900  |
| C | 2.90804000  | -3.47810500 | 1.46821200  |

|    |            |             |             |
|----|------------|-------------|-------------|
| H  | 3.70497900 | -3.16270200 | -0.51454000 |
| H  | 4.90590200 | -3.66191100 | 0.70078200  |
| C  | 4.01827500 | -3.04608400 | 0.52985000  |
| H  | 4.28350000 | -1.99880100 | 0.69952300  |
| N  | 2.43575900 | -4.84906600 | 1.23404700  |
| H  | 2.89835900 | -5.27546100 | 0.43383900  |
| H  | 1.06787200 | -4.29091000 | 0.99712600  |
| C  | 1.66784000 | -2.62388200 | 1.28193200  |
| O  | 0.61295000 | -3.30000500 | 0.99257600  |
| O  | 1.69326000 | -1.38171800 | 1.39991100  |
| H  | 2.56763800 | -5.44685900 | 2.04477600  |
| H  | 3.22279300 | -3.35527200 | 2.51137800  |
| Cu | 0.14796900 | -0.30226100 | 1.15645200  |

R-allo-I2<sup>d</sup>

|    |             |             |             |
|----|-------------|-------------|-------------|
| C  | -2.57651700 | 2.78927700  | 1.08049000  |
| H  | -3.34961100 | 4.50579800  | 0.03313600  |
| H  | -2.14179700 | 3.56966500  | -0.88669200 |
| C  | -2.41659200 | 3.93857500  | 0.10830500  |
| H  | -1.63204700 | 4.61146100  | 0.46209400  |
| N  | -3.69304600 | 1.90350500  | 0.62947500  |
| H  | -4.57293500 | 2.42840600  | 0.59445300  |
| H  | -3.50946500 | 1.53266500  | -0.30918600 |
| C  | -1.29559000 | 1.98937300  | 1.23095600  |
| O  | -1.37485000 | 0.74018100  | 0.91734600  |
| O  | -0.27985600 | 2.56033000  | 1.63539400  |
| H  | -2.85393100 | 3.15624900  | 2.07442300  |
| H  | -3.81952300 | 1.10385800  | 1.25721300  |
| C  | 2.90411600  | -3.48415700 | 1.45002700  |
| H  | 3.60210000  | -3.20423300 | -0.57739000 |
| H  | 4.86853900  | -3.62791600 | 0.59771900  |
| C  | 3.95736200  | -3.04178200 | 0.44725000  |
| H  | 4.20065500  | -1.98258500 | 0.56884300  |
| N  | 2.49662100  | -4.87889800 | 1.30536800  |
| H  | 2.89765800  | -5.28878100 | 0.46548600  |
| H  | 0.81793000  | -4.24093400 | 1.16761300  |
| C  | 1.66000700  | -2.63460900 | 1.32093200  |
| O  | 0.53863000  | -3.27214500 | 1.16846400  |
| O  | 1.70148000  | -1.39259800 | 1.36294600  |
| H  | 2.79063700  | -5.43646000 | 2.10046600  |
| H  | 3.26990900  | -3.30176100 | 2.46944500  |
| Cu | 0.15464500  | -0.30149200 | 1.13944600  |

R-allo-T3m<sup>d</sup>

|    |             |             |             |
|----|-------------|-------------|-------------|
| C  | -2.62347500 | 2.77125700  | 1.11525300  |
| H  | -3.09617800 | 4.48996700  | -0.09609300 |
| H  | -1.82139600 | 3.44322700  | -0.77476000 |
| C  | -2.22854800 | 3.86962600  | 0.14966800  |
| H  | -1.46772000 | 4.50585000  | 0.60819900  |
| N  | -3.70070000 | 1.93699200  | 0.50167700  |
| H  | -4.51276700 | 2.51784300  | 0.27014000  |
| H  | -3.36961100 | 1.49406400  | -0.36257000 |
| C  | -1.43057300 | 1.90974400  | 1.48210400  |
| O  | -1.46874700 | 0.68768000  | 1.06557900  |
| O  | -0.50283900 | 2.41390500  | 2.11940900  |
| H  | -3.03679900 | 3.19011800  | 2.03795900  |
| H  | -4.01043000 | 1.19077000  | 1.13147100  |
| C  | 2.99017300  | -3.34245600 | 1.53434500  |
| H  | 3.21215100  | -3.54654600 | -0.61547300 |
| H  | 4.72853400  | -3.64010200 | 0.31066700  |
| C  | 3.76600900  | -3.12424000 | 0.23205500  |
| H  | 3.95286000  | -2.06134700 | 0.04192300  |
| N  | 2.70695100  | -4.73565800 | 1.84773200  |
| H  | 2.38448100  | -5.20552600 | 1.00219400  |
| H  | 0.06266800  | -3.60887100 | 1.32100800  |
| C  | 1.71063700  | -2.57960900 | 1.40866900  |
| O  | 0.71027700  | -3.16625400 | 0.74506900  |
| O  | 1.61465000  | -1.40729400 | 1.77792900  |
| H  | 3.58522800  | -5.18159500 | 2.10270300  |
| H  | 3.54414400  | -2.89336200 | 2.36477500  |
| Cu | 0.03956900  | -0.34754200 | 1.43831700  |

R-allo-T3n<sup>d</sup>

|   |             |            |             |
|---|-------------|------------|-------------|
| C | -2.65642000 | 2.74470400 | 1.11984800  |
| H | -3.12307800 | 4.52577900 | 0.00005400  |
| H | -1.81917100 | 3.53613500 | -0.70851900 |
| C | -2.25354000 | 3.90183200 | 0.22936100  |
| H | -1.51162100 | 4.51876100 | 0.74214100  |
| N | -3.70703300 | 1.93324000 | 0.43373200  |
| H | -4.51671400 | 2.51818300 | 0.20416000  |
| H | -3.34490700 | 1.53247300 | -0.43873900 |

|    |             |             |             |
|----|-------------|-------------|-------------|
| C  | -1.46106100 | 1.87781000  | 1.46535900  |
| O  | -1.46418400 | 0.68776900  | 0.96505600  |
| O  | -0.56240200 | 2.35064100  | 2.16524500  |
| H  | -3.09734700 | 3.10423100  | 2.05471700  |
| H  | -4.02907200 | 1.15638100  | 1.01865500  |
| C  | 2.98757400  | -3.34757300 | 1.49963400  |
| H  | 3.21826900  | -3.71887800 | -0.62739200 |
| H  | 4.72650000  | -3.77050700 | 0.31420600  |
| C  | 3.77451800  | -3.24393700 | 0.19058700  |
| H  | 3.98449300  | -2.20238000 | -0.07846800 |
| N  | 2.66718100  | -4.70688800 | 1.91262900  |
| H  | 2.29897200  | -5.21720000 | 1.11057000  |
| H  | 0.68271000  | -3.06732000 | -0.25947400 |
| C  | 1.72854600  | -2.56435700 | 1.30477900  |
| O  | 0.70289000  | -3.17908400 | 0.70765900  |
| O  | 1.62355400  | -1.39672300 | 1.68478800  |
| H  | 3.53998600  | -5.16538800 | 2.16497500  |
| H  | 3.54692100  | -2.85369600 | 2.30028400  |
| Cu | 0.04811800  | -0.33926200 | 1.33858500  |

R-allo-I3<sup>d</sup>

|   |             |             |             |
|---|-------------|-------------|-------------|
| C | -2.64083700 | 2.78982300  | 1.10778700  |
| H | -3.11553500 | 4.57776000  | 0.00336800  |
| H | -1.80251600 | 3.60408500  | -0.71034200 |
| C | -2.24267300 | 3.95731400  | 0.22947600  |
| H | -1.50693100 | 4.57450900  | 0.75048900  |
| N | -3.69015800 | 1.98191600  | 0.41525500  |
| H | -4.50240800 | 2.56666100  | 0.19444100  |
| H | -3.32950400 | 1.59278800  | -0.46303700 |
| C | -1.44559800 | 1.92159000  | 1.45209700  |
| O | -1.48380300 | 0.70805500  | 1.01260700  |
| O | -0.51986600 | 2.41304800  | 2.10202800  |
| H | -3.08384000 | 3.13974400  | 2.04575700  |
| H | -4.00725500 | 1.19712100  | 0.99208900  |
| C | 2.98013600  | -3.37213300 | 1.50247600  |
| H | 3.20332800  | -3.59944400 | -0.64267500 |
| H | 4.72920300  | -3.58563900 | 0.27255200  |
| C | 3.73663000  | -3.13063200 | 0.19389500  |
| H | 3.85878300  | -2.06212800 | -0.01637200 |
| N | 2.79279000  | -4.77438300 | 1.84343100  |
| H | 2.43912800  | -5.26977000 | 1.02520300  |

|    |             |             |            |
|----|-------------|-------------|------------|
| H  | -0.13328400 | -2.87148000 | 0.78267600 |
| C  | 1.66531200  | -2.66604400 | 1.37779400 |
| O  | 0.68584400  | -3.38972600 | 0.90048100 |
| O  | 1.55862600  | -1.45835600 | 1.64848500 |
| H  | 3.71204400  | -5.16811400 | 2.03204700 |
| H  | 3.51227500  | -2.87696700 | 2.32135600 |
| Cu | 0.01432900  | -0.35061400 | 1.36171100 |

T4<sup>d</sup>

|    |             |             |             |
|----|-------------|-------------|-------------|
| C  | -2.52285600 | 2.74170200  | 0.91413800  |
| H  | -3.51928900 | 4.18622700  | -0.33699700 |
| H  | -2.47752200 | 3.04219500  | -1.22433300 |
| C  | -2.57384700 | 3.63541400  | -0.30724200 |
| H  | -1.75467700 | 4.35764800  | -0.26851100 |
| N  | -3.67321400 | 1.78707000  | 0.87661500  |
| H  | -4.56220400 | 2.29740500  | 0.85929700  |
| H  | -3.62925500 | 1.19629000  | 0.03899300  |
| C  | -1.21013500 | 1.98206900  | 0.99010400  |
| O  | -1.29346800 | 0.71492000  | 0.77261000  |
| O  | -0.17351200 | 2.60708200  | 1.22647200  |
| H  | -2.63155100 | 3.32556700  | 1.83324500  |
| H  | -3.67671900 | 1.16596300  | 1.69136300  |
| C  | 2.69632400  | -3.67200500 | 1.08392900  |
| H  | 4.38608000  | -3.22239300 | -0.16404400 |
| H  | 4.79965800  | -3.79540100 | 1.46421100  |
| C  | 4.09002200  | -3.18569200 | 0.89450200  |
| H  | 4.18563800  | -2.15406600 | 1.24359000  |
| N  | 2.48872800  | -5.17072000 | 0.90300600  |
| H  | 1.69869500  | -5.42517100 | 0.31362900  |
| H  | -0.34700400 | -2.89702600 | 0.71605400  |
| C  | 1.56502300  | -2.87327000 | 0.90272300  |
| O  | 0.39884400  | -3.51875000 | 0.75369500  |
| O  | 1.63281300  | -1.60444100 | 0.90293700  |
| H  | 3.36365800  | -5.63120200 | 0.66946200  |
| H  | 2.42250300  | -4.54327200 | 1.98009100  |
| Cu | 0.21849900  | -0.36432900 | 0.90558900  |

I4<sup>d</sup>

|   |             |            |            |
|---|-------------|------------|------------|
| C | -2.47200800 | 2.81220100 | 0.86169900 |
|---|-------------|------------|------------|

|    |             |             |             |
|----|-------------|-------------|-------------|
| H  | -3.61938400 | 4.07438000  | -0.46011400 |
| H  | -2.73193100 | 2.76421200  | -1.28201200 |
| C  | -2.68746800 | 3.49990800  | -0.46992600 |
| H  | -1.86149700 | 4.18759000  | -0.66647700 |
| N  | -3.64085000 | 1.92429800  | 1.15034800  |
| H  | -4.50984300 | 2.46707500  | 1.17408900  |
| H  | -3.73355300 | 1.20292600  | 0.42746900  |
| C  | -1.18502600 | 1.99884400  | 0.87611400  |
| O  | -1.32627500 | 0.73514400  | 0.99831800  |
| O  | -0.11578000 | 2.61711500  | 0.75467500  |
| H  | -2.42917600 | 3.54195400  | 1.67673900  |
| H  | -3.53535100 | 1.44360400  | 2.04824300  |
| C  | 2.71681100  | -3.69776900 | 0.91185700  |
| H  | 4.65277300  | -3.58562000 | 0.07423800  |
| H  | 4.61576400  | -3.61227700 | 1.83730000  |
| C  | 4.09808800  | -3.21905700 | 0.95022200  |
| H  | 4.13252100  | -2.12936900 | 0.96804900  |
| N  | 2.51681300  | -5.13272000 | 0.87088100  |
| H  | 2.97062800  | -5.54507600 | 0.04120100  |
| H  | -0.35310100 | -2.88843600 | 0.83968700  |
| C  | 1.54863800  | -2.86209300 | 0.90897400  |
| O  | 0.39699400  | -3.51578600 | 0.84630100  |
| O  | 1.64994700  | -1.62779900 | 0.96012500  |
| H  | 2.94635900  | -5.58590600 | 1.69206000  |
| H  | 1.52305700  | -5.39546200 | 0.84924600  |
| Cu | 0.21684900  | -0.37693900 | 0.97104900  |

T5<sup>d</sup>

|   |             |             |             |
|---|-------------|-------------|-------------|
| C | -2.82009200 | 2.28194200  | -0.03557500 |
| H | -4.08594400 | 3.09356500  | -1.58397800 |
| H | -3.25629300 | 1.58009500  | -2.03147600 |
| C | -3.15241000 | 2.52919700  | -1.49194800 |
| H | -2.35260300 | 3.10949600  | -1.95806700 |
| N | -3.95014200 | 1.54142500  | 0.60675900  |
| H | -4.82135000 | 2.07580400  | 0.53167900  |
| H | -4.09131500 | 0.63389800  | 0.15087200  |
| C | -1.52469400 | 1.49748100  | 0.12257500  |
| O | -1.63405800 | 0.33769400  | 0.64802600  |
| O | -0.48036700 | 2.03475700  | -0.27840400 |
| H | -2.71976500 | 3.22659600  | 0.50835400  |
| H | -3.76646800 | 1.35944700  | 1.59762200  |
| C | 2.90148200  | -3.65023700 | 1.22875200  |

|    |             |             |             |
|----|-------------|-------------|-------------|
| H  | 4.95622400  | -3.66494700 | 0.67272700  |
| H  | 4.45530900  | -2.30141900 | 1.70051500  |
| C  | 4.15284500  | -2.95016800 | 0.86746400  |
| H  | 3.99604200  | -2.32804500 | -0.01605100 |
| N  | 2.98860300  | -4.89196700 | 1.92314900  |
| H  | 2.72903200  | -4.77167000 | 0.63097000  |
| H  | -0.18984800 | -3.10938100 | 1.82962100  |
| C  | 1.61807100  | -2.94120400 | 1.29509000  |
| O  | 0.64116000  | -3.62679300 | 1.84766100  |
| O  | 1.51855400  | -1.80333900 | 0.83833100  |
| H  | 3.90659600  | -5.32875900 | 2.03198300  |
| H  | 2.16949400  | -5.29766900 | 2.38295700  |
| Cu | -0.06747000 | -0.72560200 | 0.80002800  |

R-15<sup>d</sup>

|    |             |             |             |
|----|-------------|-------------|-------------|
| C  | -2.35178300 | 2.87718200  | 0.96013200  |
| H  | -4.09446600 | 3.67598500  | -0.02177500 |
| H  | -3.76765600 | 1.96228300  | -0.39173400 |
| C  | -3.30659900 | 2.94066600  | -0.21280400 |
| H  | -2.76431200 | 3.24230500  | -1.11195000 |
| N  | -3.11035500 | 2.53066500  | 2.19996500  |
| H  | -3.83442400 | 3.23342900  | 2.38139200  |
| H  | -3.57150700 | 1.61934600  | 2.10459500  |
| C  | -1.23294200 | 1.87854000  | 0.72609400  |
| O  | -1.16289600 | 0.90793100  | 1.57347200  |
| O  | -0.47746100 | 2.04455300  | -0.23440500 |
| H  | -1.89105500 | 3.85418600  | 1.14133700  |
| H  | -2.49717800 | 2.48088800  | 3.01914200  |
| C  | 3.17753900  | -3.38055300 | 1.24932200  |
| H  | 5.12004100  | -3.39085800 | 2.16406400  |
| H  | 3.77677300  | -3.30579300 | 3.32779400  |
| C  | 4.13678900  | -2.95053800 | 2.35392700  |
| H  | 4.24112900  | -1.86188600 | 2.39348200  |
| N  | 3.07641800  | -4.82302300 | 1.19930500  |
| H  | 3.54621600  | -3.00619700 | 0.28720500  |
| H  | 0.18325600  | -2.76841900 | 2.33683500  |
| C  | 1.87963900  | -2.65309800 | 1.49134700  |
| O  | 0.97675200  | -3.31198500 | 2.16973300  |
| O  | 1.72461700  | -1.48539500 | 1.09945700  |
| H  | 2.77496400  | -5.17762000 | 2.10537700  |
| H  | 2.37647100  | -5.10827200 | 0.51854500  |
| Cu | 0.20814100  | -0.34413700 | 1.34652700  |



R-T6m<sup>d</sup>

|    |             |             |             |
|----|-------------|-------------|-------------|
| C  | -2.53575800 | 2.64360000  | 1.18893400  |
| H  | -3.90263500 | 3.68023900  | -0.11419400 |
| H  | -3.15643400 | 2.23185700  | -0.83972000 |
| C  | -2.98076800 | 3.09474400  | -0.18666800 |
| H  | -2.20752700 | 3.72285300  | -0.63507800 |
| N  | -3.62303100 | 1.83784500  | 1.82359300  |
| H  | -4.47820700 | 2.39739500  | 1.90421000  |
| H  | -3.84069300 | 1.00896100  | 1.25954400  |
| C  | -1.24994200 | 1.84126500  | 1.12298100  |
| O  | -1.32691700 | 0.62074300  | 1.53256600  |
| O  | -0.23255500 | 2.38027200  | 0.68131800  |
| H  | -2.36172400 | 3.50325800  | 1.84422400  |
| H  | -3.36145000 | 1.51474600  | 2.76008900  |
| C  | 2.89392500  | -3.65662900 | 1.35817300  |
| H  | 4.99951300  | -3.61234900 | 0.98911800  |
| H  | 4.42432300  | -2.28226100 | 2.01635600  |
| C  | 4.18566100  | -2.89597200 | 1.13929200  |
| H  | 4.13433100  | -2.24408400 | 0.26126700  |
| N  | 2.90829300  | -4.59166100 | 2.47803800  |
| H  | 2.65023900  | -4.23640600 | 0.45258500  |
| H  | 0.23984500  | -3.35213700 | 2.61385100  |
| C  | 1.70552100  | -2.74702900 | 1.49020200  |
| O  | 0.51167900  | -3.31887100 | 1.68039600  |
| O  | 1.79057100  | -1.52874800 | 1.32494900  |
| H  | 3.47460000  | -5.39404700 | 2.21619000  |
| H  | 3.38340100  | -4.14944100 | 3.26367600  |
| Cu | 0.21332400  | -0.39985600 | 1.38297800  |

R-T6n<sup>d</sup>

|   |             |            |             |
|---|-------------|------------|-------------|
| C | -2.49380500 | 2.67013400 | 0.89420200  |
| H | -4.30826500 | 3.29916000 | -0.08390100 |
| H | -3.87155500 | 1.59389200 | -0.37433100 |
| C | -3.47609300 | 2.60969900 | -0.25693000 |
| H | -2.97375900 | 2.89981700 | -1.18309200 |
| N | -3.19442400 | 2.31465300 | 2.16460000  |
| H | -3.97200200 | 2.96082800 | 2.33428500  |

|    |             |             |             |
|----|-------------|-------------|-------------|
| H  | -3.57640400 | 1.36355500  | 2.11872300  |
| C  | -1.31752600 | 1.74311500  | 0.66064600  |
| O  | -1.25039100 | 0.70559800  | 1.42460700  |
| O  | -0.51779600 | 2.01122700  | -0.24035700 |
| H  | -2.10393500 | 3.68451800  | 1.02358000  |
| H  | -2.56373400 | 2.35587900  | 2.97105300  |
| C  | 3.08215800  | -3.44101900 | 1.11990200  |
| H  | 4.96403300  | -3.61581100 | 2.13759000  |
| H  | 3.60223600  | -3.23676200 | 3.21835700  |
| C  | 4.04580400  | -3.02790300 | 2.23681000  |
| H  | 4.30211000  | -1.96422400 | 2.17958700  |
| N  | 2.71454800  | -4.84885500 | 1.12293400  |
| H  | 3.52586200  | -3.18784000 | 0.15135300  |
| H  | 0.17516700  | -3.48714900 | 1.64283400  |
| C  | 1.86221200  | -2.59046100 | 1.26706400  |
| O  | 0.90429300  | -3.02366000 | 2.09174600  |
| O  | 1.78830900  | -1.46809600 | 0.76157600  |
| H  | 3.53913600  | -5.38498000 | 0.86223800  |
| H  | 2.48525900  | -5.12728600 | 2.07675000  |
| Cu | 0.23814700  | -0.36917300 | 1.08670300  |

R-16<sup>d</sup>

|   |             |             |             |
|---|-------------|-------------|-------------|
| C | -2.53601500 | 2.64837800  | 1.10172400  |
| H | -4.00434200 | 3.65492100  | -0.11208200 |
| H | -3.41901000 | 2.11557400  | -0.79712200 |
| C | -3.12608700 | 3.01524100  | -0.24349000 |
| H | -2.38584500 | 3.56305600  | -0.83127800 |
| N | -3.56974700 | 1.95624000  | 1.93049000  |
| H | -4.37761300 | 2.57014100  | 2.07562000  |
| H | -3.90099300 | 1.10372500  | 1.46567200  |
| C | -1.30335900 | 1.77649500  | 0.95742800  |
| O | -1.36578900 | 0.61123300  | 1.50613100  |
| O | -0.33293000 | 2.21779700  | 0.33574100  |
| H | -2.24373100 | 3.54636900  | 1.65666100  |
| H | -3.20183600 | 1.68617400  | 2.84769400  |
| C | 2.94267300  | -3.59795500 | 1.16059800  |
| H | 5.08709400  | -3.55546200 | 1.13939000  |
| H | 4.36124100  | -2.65526700 | 2.49076300  |
| C | 4.26302500  | -2.89553600 | 1.42540500  |
| H | 4.34257600  | -1.96956900 | 0.84893500  |
| N | 2.74633000  | -4.82343300 | 1.93035300  |
| H | 2.85595600  | -3.81980500 | 0.08792800  |

|    |            |             |            |
|----|------------|-------------|------------|
| H  | 1.16932200 | -4.10783100 | 2.42353900 |
| C  | 1.77278700 | -2.68707700 | 1.45615800 |
| O  | 0.83228300 | -3.18402300 | 2.20249000 |
| O  | 1.69651300 | -1.53411000 | 0.99897400 |
| H  | 2.82264600 | -5.64666800 | 1.34215100 |
| H  | 3.43939200 | -4.89886000 | 2.67113200 |
| Cu | 0.15613400 | -0.44121900 | 1.28499200 |

R-T7<sup>d</sup>

|    |             |             |             |
|----|-------------|-------------|-------------|
| C  | -2.52534400 | 2.62710300  | 1.08992600  |
| H  | -4.03282400 | 3.68090500  | -0.03100100 |
| H  | -3.52472600 | 2.13537400  | -0.76208300 |
| C  | -3.17934900 | 3.02142900  | -0.21702500 |
| H  | -2.45986700 | 3.55772200  | -0.83989300 |
| N  | -3.52978000 | 1.95798300  | 1.97291000  |
| H  | -4.30543000 | 2.59646700  | 2.17625600  |
| H  | -3.91971900 | 1.12462800  | 1.51877200  |
| C  | -1.32297700 | 1.72542200  | 0.88236200  |
| O  | -1.33849700 | 0.60093500  | 1.51318000  |
| O  | -0.41038700 | 2.10946600  | 0.14515200  |
| H  | -2.17886700 | 3.51316300  | 1.63368600  |
| H  | -3.11420900 | 1.66026800  | 2.86068800  |
| C  | 2.99477100  | -3.57338000 | 1.12803500  |
| H  | 5.13304800  | -3.56499000 | 1.32566000  |
| H  | 4.28369800  | -2.65280500 | 2.59663200  |
| C  | 4.29132000  | -2.89634800 | 1.52753800  |
| H  | 4.43640500  | -1.97292300 | 0.95994200  |
| N  | 2.68621500  | -4.77924500 | 1.90865000  |
| H  | 3.00400600  | -3.80898500 | 0.05698100  |
| H  | 1.39032400  | -4.14442500 | 2.29801200  |
| C  | 1.80011200  | -2.66742800 | 1.36197300  |
| O  | 0.89462900  | -3.19136700 | 2.11088500  |
| O  | 1.71704500  | -1.52538200 | 0.86645300  |
| H  | 2.65215300  | -5.61512200 | 1.33222700  |
| H  | 3.35847500  | -4.92542400 | 2.65904700  |
| Cu | 0.17567900  | -0.45191900 | 1.19394200  |

R-I7<sup>d</sup>

|   |             |            |            |
|---|-------------|------------|------------|
| C | -2.50089400 | 2.61891000 | 1.10496600 |
|---|-------------|------------|------------|

|    |             |             |             |
|----|-------------|-------------|-------------|
| H  | -3.99678700 | 3.71579900  | 0.00949200  |
| H  | -3.49183700 | 2.19162000  | -0.76739300 |
| C  | -3.14551300 | 3.05799300  | -0.19208600 |
| H  | -2.41953200 | 3.61010100  | -0.79326200 |
| N  | -3.51491700 | 1.93236600  | 1.96342500  |
| H  | -4.28295000 | 2.57212700  | 2.18981700  |
| H  | -3.91415100 | 1.12054800  | 1.47954000  |
| C  | -1.30459400 | 1.71261300  | 0.87877000  |
| O  | -1.32150800 | 0.58152600  | 1.49439500  |
| O  | -0.39363700 | 2.10516500  | 0.14229600  |
| H  | -2.15025200 | 3.48565000  | 1.67663500  |
| H  | -3.10290600 | 1.59605700  | 2.83907500  |
| C  | 2.88197500  | -3.55079800 | 1.14372600  |
| H  | 5.03363200  | -3.61217400 | 1.22344200  |
| H  | 4.28375600  | -2.59290400 | 2.47908700  |
| C  | 4.22184300  | -2.90781500 | 1.43081400  |
| H  | 4.35498000  | -2.03115000 | 0.79302700  |
| N  | 2.74068200  | -4.79547100 | 1.95770500  |
| H  | 2.81041300  | -3.85393700 | 0.09361200  |
| H  | 1.83373600  | -5.24612900 | 1.80363200  |
| C  | 1.70723300  | -2.64336900 | 1.45841800  |
| O  | 0.84615400  | -2.98648800 | 2.27730300  |
| O  | 1.70539200  | -1.53580800 | 0.80382100  |
| H  | 3.48113900  | -5.46371700 | 1.72279200  |
| H  | 2.80905900  | -4.58195200 | 2.95908300  |
| Cu | 0.19824200  | -0.47295700 | 1.15645300  |

R-T8<sup>d</sup>

|   |             |             |             |
|---|-------------|-------------|-------------|
| C | -3.64398200 | -0.25351200 | 0.16971200  |
| H | -5.11227000 | 0.92354300  | -0.87638000 |
| H | -3.85444600 | 0.22009000  | -1.92754700 |
| C | -4.04773800 | 0.68121500  | -0.95198500 |
| H | -3.47564800 | 1.60927300  | -0.88205400 |
| N | -4.47398200 | -1.49260100 | 0.11334100  |
| H | -5.46731800 | -1.25972200 | 0.21120100  |
| H | -4.34837500 | -1.97398700 | -0.78430400 |
| C | -2.18984100 | -0.64664800 | 0.08304300  |
| O | -1.84212700 | -1.82961900 | -0.10478500 |
| O | -1.32730000 | 0.29419900  | 0.18876600  |
| H | -3.82451200 | 0.20567800  | 1.14729300  |
| H | -4.22192800 | -2.15299700 | 0.85553100  |
| C | 4.11859600  | -0.51325600 | -0.62563000 |

|    |            |             |             |
|----|------------|-------------|-------------|
| H  | 5.90977800 | 0.19531900  | 0.33286800  |
| H  | 4.63136200 | -0.32073000 | 1.46515900  |
| C  | 4.83078000 | 0.18529500  | 0.51380800  |
| H  | 4.48274100 | 1.21827100  | 0.58508000  |
| N  | 4.63659000 | -1.90534200 | -0.77248000 |
| H  | 4.31154800 | -0.00346300 | -1.57621900 |
| H  | 4.16830500 | -2.40814100 | -1.53331900 |
| C  | 2.62793100 | -0.55364700 | -0.42029100 |
| O  | 2.00099200 | -1.66221400 | -0.42334700 |
| O  | 1.99797100 | 0.51857200  | -0.23302700 |
| H  | 5.64211600 | -1.88758000 | -0.97202900 |
| H  | 4.49584400 | -2.44362000 | 0.09011100  |
| Cu | 0.27626000 | -0.74274200 | -0.08729300 |

R-A<sub>2</sub>-Cu(II)<sup>d</sup>

|    |             |             |             |
|----|-------------|-------------|-------------|
| C  | -2.47705200 | 2.62746600  | 1.13087100  |
| H  | -3.93699300 | 3.67655900  | -0.05224900 |
| H  | -3.41372800 | 2.11986200  | -0.74918900 |
| C  | -3.08214200 | 3.01072200  | -0.20379800 |
| H  | -2.33783600 | 3.53557200  | -0.80696000 |
| N  | -3.51116100 | 1.97354400  | 1.98762600  |
| H  | -4.28490200 | 2.62252800  | 2.16454700  |
| H  | -3.89896700 | 1.14276100  | 1.52551300  |
| C  | -1.30898800 | 1.69126700  | 0.97192300  |
| O  | -1.29943500 | 0.56006700  | 1.54622400  |
| O  | -0.33728100 | 2.02433600  | 0.23804100  |
| H  | -2.13105600 | 3.51395900  | 1.67392100  |
| H  | -3.12688200 | 1.67557200  | 2.89008500  |
| C  | 3.42961600  | -2.26771100 | 0.14911800  |
| H  | 5.56767900  | -2.23730900 | 0.38939800  |
| H  | 4.68816500  | -1.20336300 | 1.54629700  |
| C  | 4.71839500  | -1.55804100 | 0.50980600  |
| H  | 4.86429700  | -0.70089500 | -0.15125900 |
| N  | 3.26577700  | -3.48141600 | 1.00280800  |
| H  | 3.45040000  | -2.61171500 | -0.89064300 |
| H  | 2.39963700  | -3.98644500 | 0.78998500  |
| C  | 2.22669000  | -1.37993400 | 0.32588800  |
| O  | 1.26247800  | -1.71796500 | 1.06908500  |
| O  | 2.19801800  | -0.25737300 | -0.26263200 |
| H  | 4.05414200  | -4.12130000 | 0.86139100  |
| H  | 3.24118300  | -3.22741800 | 1.99728400  |
| Cu | 0.45481900  | 0.15150500  | 0.64585200  |

## 2.2 The stagnation coordinates of the main elementary reaction under the dominant aqueous solvent effect

### 2.2.1 Coordinates of stationary point of a and b channel speed step

S-II·(H<sub>2</sub>O)<sub>2</sub><sup>a(b)</sup>

|    |             |             |             |
|----|-------------|-------------|-------------|
| C  | 4.06983700  | 0.55120500  | 0.17227000  |
| H  | 4.50673600  | 0.12282500  | -1.90040100 |
| H  | 5.93364700  | 0.52546700  | -0.90883600 |
| C  | 4.87944100  | 0.76106600  | -1.09036500 |
| H  | 4.80730800  | 1.80528400  | -1.40653100 |
| N  | 4.21977400  | -0.86382200 | 0.62646300  |
| H  | 5.20700700  | -1.07903000 | 0.79926300  |
| H  | 3.87300300  | -1.51319000 | -0.08793200 |
| C  | 2.60485700  | 0.87793100  | -0.04611400 |
| O  | 1.79765400  | -0.11488600 | -0.00158800 |
| O  | 2.28715300  | 2.05497500  | -0.26773600 |
| H  | 3.69533100  | -1.04475100 | 1.48765000  |
| H  | 4.44611300  | 1.18539000  | 0.98373500  |
| C  | -4.13815400 | -0.20083000 | -0.31371500 |
| H  | -4.39824700 | 0.98046400  | 1.47604500  |
| H  | -5.67488300 | 1.19903200  | 0.25037400  |
| C  | -4.60075500 | 1.05147200  | 0.40081700  |
| H  | -4.07428700 | 1.92121300  | 0.00135600  |
| N  | -4.91982500 | -1.37222000 | 0.18187800  |
| H  | -5.92106300 | -1.23233600 | 0.01488700  |
| H  | -4.77885000 | -1.50083500 | 1.19008500  |
| C  | -2.66254000 | -0.48439600 | -0.09573800 |
| O  | -2.28998200 | -1.51712300 | 0.47266200  |
| O  | -1.88976800 | 0.44112000  | -0.54183100 |
| H  | -4.63217900 | -2.24012600 | -0.28027600 |
| H  | -4.32644300 | -0.12961900 | -1.39005300 |
| Cu | -0.04467400 | 0.18951200  | -0.25792200 |
| O  | 6.49681900  | 2.75212300  | 1.29997900  |
| H  | 6.86965800  | 2.25851400  | 0.55950000  |
| H  | 5.70536600  | 3.19512700  | 0.92814000  |

|   |             |             |             |
|---|-------------|-------------|-------------|
| O | 4. 22188400 | 4. 03257300 | 0. 24235000 |
| H | 3. 52865500 | 3. 36461800 | 0. 05710800 |
| H | 3. 83752000 | 4. 61704600 | 0. 90738200 |

**S-T2·(H<sub>2</sub>O)<sub>2</sub><sup>a(b)</sup>**

|    |              |              |              |
|----|--------------|--------------|--------------|
| C  | 4. 19734800  | 0. 52810100  | 0. 03206600  |
| H  | 5. 03225800  | 0. 05060600  | -1. 92427300 |
| H  | 6. 19035700  | 0. 71441600  | -0. 74331700 |
| C  | 5. 15944800  | 0. 77820400  | -1. 11145700 |
| H  | 5. 02012800  | 1. 78131600  | -1. 52350400 |
| N  | 4. 37240800  | -0. 86421400 | 0. 53839900  |
| H  | 5. 33743600  | -0. 99111300 | 0. 85831300  |
| H  | 4. 19037100  | -1. 57323600 | -0. 18290400 |
| C  | 2. 79289300  | 0. 78310600  | -0. 22776100 |
| O  | 1. 91130800  | -0. 08346100 | 0. 01009700  |
| O  | 2. 41288500  | 1. 95594200  | -0. 66602900 |
| H  | 3. 75398000  | -1. 06318700 | 1. 33040300  |
| H  | 4. 58082300  | 1. 35661600  | 0. 96471800  |
| C  | -4. 04299800 | -0. 04082000 | -0. 22807200 |
| H  | -4. 37745200 | 0. 82239800  | 1. 72416400  |
| H  | -5. 59876600 | 1. 25701200  | 0. 49982200  |
| C  | -4. 53242400 | 1. 07603000  | 0. 66892600  |
| H  | -3. 98721100 | 1. 99580700  | 0. 44519100  |
| N  | -4. 85105400 | -1. 27083200 | 0. 02233400  |
| H  | -5. 84096300 | -1. 09759100 | -0. 17749000 |
| H  | -4. 77083600 | -1. 56233300 | 1. 00296700  |
| C  | -2. 57864100 | -0. 37738200 | -0. 01101300 |
| O  | -2. 23027800 | -1. 50380300 | 0. 35695400  |
| O  | -1. 78762600 | 0. 60837400  | -0. 25247900 |
| H  | -4. 53473400 | -2. 05459600 | -0. 55655100 |
| H  | -4. 18302000 | 0. 21673900  | -1. 28332500 |
| Cu | 0. 04414000  | 0. 28089200  | -0. 09777600 |
| O  | 5. 05477200  | 2. 28229100  | 1. 77366200  |
| H  | 6. 01608500  | 2. 21038700  | 1. 72284300  |
| H  | 4. 55289100  | 3. 39988100  | 0. 63466500  |
| O  | 4. 13048700  | 3. 86168800  | -0. 15062800 |
| H  | 3. 11226700  | 2. 68648500  | -0. 57117900 |
| H  | 3. 63256700  | 4. 60492500  | 0. 21284500  |

**I2·(H<sub>2</sub>O)<sub>2</sub><sup>a(b)</sup>**

|   |             |             |              |
|---|-------------|-------------|--------------|
| C | 4. 19399200 | 0. 34418300 | -0. 61380800 |
|---|-------------|-------------|--------------|

|    |             |             |             |
|----|-------------|-------------|-------------|
| H  | 6.13088300  | 1.06399500  | -1.16687400 |
| H  | 5.70140300  | 1.40517000  | 0.51628900  |
| C  | 5.29611400  | 1.33548600  | -0.50396300 |
| H  | 4.95818700  | 2.33293500  | -0.79631600 |
| N  | 4.61851200  | -1.05722600 | -0.48722800 |
| H  | 5.07960800  | -1.23519500 | 0.41180400  |
| H  | 5.28141000  | -1.33399600 | -1.22231900 |
| C  | 2.90787100  | 0.51592100  | -1.03489900 |
| O  | 2.14491900  | -0.48898400 | -1.36158400 |
| O  | 2.33181100  | 1.73091300  | -1.16617700 |
| H  | 3.80418900  | -1.67902700 | -0.55759100 |
| H  | 3.47000400  | 0.76821400  | 1.49319400  |
| C  | -3.75620100 | -1.09421400 | -0.96339800 |
| H  | -3.91896000 | -0.58467800 | 1.13074800  |
| H  | -5.29798700 | -0.05882300 | 0.13049400  |
| C  | -4.21019400 | -0.17942300 | 0.15459900  |
| H  | -3.75318000 | 0.80533100  | 0.03349500  |
| N  | -4.45080400 | -2.41066300 | -0.84336200 |
| H  | -5.46503700 | -2.28881400 | -0.92165700 |
| H  | -4.25073600 | -2.84578700 | 0.06380600  |
| C  | -2.25525000 | -1.33565300 | -0.95314600 |
| O  | -1.79619100 | -2.47587800 | -0.81815500 |
| O  | -1.56959200 | -0.25955200 | -1.09227600 |
| H  | -4.14476700 | -3.06403500 | -1.57060900 |
| H  | -4.03277600 | -0.68306900 | -1.93998200 |
| Cu | 0.30557800  | -0.37911800 | -1.10956600 |
| O  | 3.27392300  | 1.27449900  | 2.30273500  |
| H  | 4.09078100  | 1.23590400  | 2.81766300  |
| H  | 3.21263300  | 2.89414200  | 1.40464600  |
| O  | 3.17621100  | 3.55266300  | 0.67798300  |
| H  | 2.74010100  | 2.41912800  | -0.57958700 |
| H  | 2.41851200  | 4.11539200  | 0.88249700  |

**S-II ← H<sub>2</sub>O · (H<sub>2</sub>O)<sub>2</sub><sup>a(b)</sup>**

|   |            |             |             |
|---|------------|-------------|-------------|
| C | 4.23682000 | 0.54819700  | 0.02992500  |
| H | 4.50820700 | 0.71058500  | -2.10790300 |
| H | 5.94445000 | 1.14382800  | -1.14263200 |
| C | 4.85178400 | 1.20180000  | -1.18982800 |
| H | 4.56363100 | 2.25567400  | -1.22790200 |
| N | 4.66637000 | -0.88087900 | 0.10080500  |



|    |             |             |             |
|----|-------------|-------------|-------------|
| H  | 5.68689100  | -0.94593700 | 0.16858100  |
| H  | 4.36920700  | -1.39450100 | -0.73597400 |
| C  | 2.72212400  | 0.63913300  | 0.01161100  |
| O  | 2.09300400  | -0.46857600 | -0.10189400 |
| O  | 2.19845200  | 1.76111700  | 0.09658100  |
| H  | 4.26041500  | -1.35654900 | 0.91242900  |
| H  | 4.59457700  | 1.02897400  | 0.94845300  |
| C  | -4.00873600 | -0.27222500 | -0.45999300 |
| H  | -4.18039300 | 1.51429300  | 0.74340200  |
| H  | -5.24946500 | 1.47221600  | -0.68270800 |
| C  | -4.25438700 | 1.21251300  | -0.30781600 |
| H  | -3.51420300 | 1.77069500  | -0.88524900 |
| N  | -5.08040900 | -1.03127200 | 0.25056600  |
| H  | -5.99646900 | -0.82602300 | -0.15929200 |
| H  | -5.11117800 | -0.77421800 | 1.24340100  |
| C  | -2.65790100 | -0.72497100 | 0.07236600  |
| O  | -2.60181300 | -1.64688100 | 0.90399300  |
| O  | -1.67228300 | -0.08762300 | -0.42998500 |
| H  | -4.91877200 | -2.04183000 | 0.20040000  |
| H  | -4.06615700 | -0.56840600 | -1.51339200 |
| Cu | 0.18795800  | -0.39977600 | -0.11780700 |
| O  | 6.32049300  | 2.77517100  | 1.69677700  |
| H  | 6.65075200  | 2.36553200  | 0.88779400  |
| H  | 5.45427100  | 3.15924800  | 1.44524900  |
| O  | 3.81880400  | 3.87419900  | 1.00657900  |
| H  | 3.23105500  | 3.15650400  | 0.68906600  |
| H  | 3.39238000  | 4.21368700  | 1.80324000  |
| O  | 0.05266700  | -2.16508400 | 0.93279700  |
| H  | 0.50633700  | -2.03600600 | 1.77860700  |
| H  | -0.91499900 | -2.14599100 | 1.12964600  |

**S-T2←H<sub>2</sub>O·(H<sub>2</sub>O)<sub>2</sub><sup>a(b)</sup>**

|   |            |             |             |
|---|------------|-------------|-------------|
| C | 4.28601800 | 0.53840900  | -0.11493600 |
| H | 5.14490200 | 0.69830000  | -2.11181300 |
| H | 6.17884100 | 1.29541600  | -0.78858500 |
| C | 5.14612000 | 1.23190800  | -1.15173000 |
| H | 4.79681100 | 2.25334800  | -1.32572100 |
| N | 4.75274500 | -0.86803600 | 0.05639300  |
| H | 5.73460800 | -0.86988400 | 0.34888700  |
| H | 4.68762100 | -1.41430500 | -0.81150200 |

|    |             |             |             |
|----|-------------|-------------|-------------|
| C  | 2.85110000  | 0.55090500  | -0.33400700 |
| O  | 2.17556100  | -0.50869400 | -0.31852300 |
| O  | 2.22315600  | 1.69024500  | -0.49519900 |
| H  | 4.21474400  | -1.36354500 | 0.77346600  |
| H  | 4.52168900  | 1.19589000  | 0.99079500  |
| C  | -3.93774000 | -0.17535600 | -0.30844100 |
| H  | -3.93507000 | 1.58243800  | 0.94914000  |
| H  | -5.12268100 | 1.62199100  | -0.37996300 |
| C  | -4.11049500 | 1.31407800  | -0.09926400 |
| H  | -3.39972500 | 1.85922800  | -0.72457700 |
| N  | -4.96228200 | -0.91263100 | 0.48896600  |
| H  | -5.90731800 | -0.64257900 | 0.19907500  |
| H  | -4.86327700 | -0.70237900 | 1.48843700  |
| C  | -2.55867700 | -0.66632600 | 0.10037800  |
| O  | -2.44351200 | -1.48124600 | 1.03044300  |
| O  | -1.61353700 | -0.15954100 | -0.59563100 |
| H  | -4.86659700 | -1.92664700 | 0.37845500  |
| H  | -4.10224600 | -0.44490900 | -1.35687100 |
| Cu | 0.25471900  | -0.45231700 | -0.33069400 |
| O  | 4.82158300  | 1.99510800  | 1.99049400  |
| H  | 5.77719500  | 2.12339400  | 1.94348400  |
| H  | 4.07972100  | 3.20749000  | 1.11926200  |
| O  | 3.55126800  | 3.74309300  | 0.45366000  |
| H  | 2.76060600  | 2.50915700  | -0.22976600 |
| H  | 2.93190500  | 4.27397100  | 0.97027200  |
| O  | 0.13339800  | -2.21563100 | 0.69920700  |
| H  | 0.73783100  | -2.15865200 | 1.45389200  |
| H  | -0.78127500 | -2.11596200 | 1.05800900  |

**I2←H<sub>2</sub>O·(H<sub>2</sub>O)<sub>2</sub><sup>a(b)</sup>**

|   |            |             |             |
|---|------------|-------------|-------------|
| C | 4.28479600 | 0.33763400  | -0.42240000 |
| H | 6.00305600 | 0.97716200  | -1.53278800 |
| H | 5.89831000 | 1.68672600  | 0.08624500  |
| C | 5.30074100 | 1.36521400  | -0.77926800 |
| H | 4.82909900 | 2.25588000  | -1.20253400 |
| N | 4.85541600 | -0.96585800 | -0.04732700 |
| H | 5.46052600 | -0.89526500 | 0.77781500  |
| H | 5.42418900 | -1.37342600 | -0.80021800 |
| C | 2.94423800 | 0.31452800  | -0.68658500 |
| O | 2.23794000 | -0.77362800 | -0.61335600 |

|    |             |             |             |
|----|-------------|-------------|-------------|
| O  | 2.25258000  | 1.41877800  | -1.04966900 |
| H  | 4.10507900  | -1.63334200 | 0.16531300  |
| H  | 3.87165000  | 1.34577100  | 1.49303100  |
| C  | -3.76200900 | -0.00412700 | -0.13883800 |
| H  | -3.36353500 | 1.63367400  | 1.21386600  |
| H  | -4.68088200 | 1.93619100  | 0.05155800  |
| C  | -3.69667100 | 1.47494800  | 0.18130800  |
| H  | -2.99348000 | 1.96802600  | -0.49381900 |
| N  | -4.77677400 | -0.65686700 | 0.74076500  |
| H  | -5.69416300 | -0.21765900 | 0.61868300  |
| H  | -4.50851200 | -0.56924900 | 1.72738100  |
| C  | -2.42290300 | -0.69140600 | 0.07063300  |
| O  | -2.30245500 | -1.54360600 | 0.96721000  |
| O  | -1.51159900 | -0.28876800 | -0.72978500 |
| H  | -4.86668200 | -1.65679700 | 0.53673400  |
| H  | -4.08597300 | -0.16852000 | -1.17137100 |
| Cu | 0.35484700  | -0.66491800 | -0.58631800 |
| O  | 3.75072300  | 2.05382300  | 2.15522900  |
| H  | 4.63250800  | 2.19830200  | 2.52280500  |
| H  | 3.39036200  | 3.34748200  | 0.88097800  |
| O  | 3.17176400  | 3.76114500  | 0.01823500  |
| H  | 2.67749300  | 2.26504500  | -0.75525400 |
| H  | 2.39211200  | 4.30561400  | 0.18634300  |
| O  | 0.20290000  | -2.43408400 | 0.45092900  |
| H  | 0.84676200  | -2.40329300 | 1.17357600  |
| H  | -0.68515400 | -2.29265000 | 0.85757900  |

**S-II←(H<sub>2</sub>O)<sub>2</sub>·(H<sub>2</sub>O)<sub>2</sub><sup>a(b)</sup>**

|   |            |             |             |
|---|------------|-------------|-------------|
| C | 3.64467100 | 0.23519700  | 0.18392700  |
| H | 4.32807800 | -0.37197400 | -1.77413300 |
| H | 5.62174400 | 0.16159100  | -0.66904600 |
| C | 4.59187000 | 0.34920200  | -0.99153900 |
| H | 4.54026900 | 1.35619100  | -1.41305600 |
| N | 3.77376900 | -1.12128100 | 0.79536400  |
| H | 4.73347400 | -1.27422000 | 1.12052900  |
| H | 3.55058100 | -1.85250400 | 0.11099700  |
| C | 2.19906100 | 0.49423100  | -0.20954100 |
| O | 1.37654200 | -0.44518500 | 0.01482700  |
| O | 1.94129100 | 1.60577000  | -0.71969400 |
| H | 3.13855300 | -1.24080700 | 1.58990300  |
| H | 3.91223700 | 0.95581000  | 0.96673300  |

|    |             |             |             |
|----|-------------|-------------|-------------|
| C  | -4.85054900 | -0.76150000 | -0.37417900 |
| H  | -5.20477700 | 0.81451900  | 1.05968200  |
| H  | -6.30227100 | 0.83380700  | -0.34543800 |
| C  | -5.27240900 | 0.65038900  | -0.02261100 |
| H  | -4.62002700 | 1.36712300  | -0.52725100 |
| N  | -5.78375300 | -1.73099700 | 0.27362000  |
| H  | -6.74752500 | -1.56628500 | -0.03278500 |
| H  | -5.74901000 | -1.63271100 | 1.29432100  |
| C  | -3.43449900 | -1.05357900 | 0.09963100  |
| O  | -3.26740700 | -1.81947600 | 1.06919600  |
| O  | -2.53864400 | -0.43685200 | -0.55914900 |
| H  | -5.53622600 | -2.70018700 | 0.05198100  |
| H  | -4.91125100 | -0.93603100 | -1.45248400 |
| Cu | -0.58901200 | -0.41184100 | -0.24796900 |
| O  | 5.82126100  | 2.58220600  | 1.48910500  |
| H  | 6.26289100  | 1.95271800  | 0.90595800  |
| H  | 5.10040500  | 2.96182500  | 0.94423800  |
| O  | 3.72981300  | 3.70011300  | -0.04379000 |
| H  | 3.08792000  | 3.00658600  | -0.29982200 |
| H  | 3.23076300  | 4.31214700  | 0.51131100  |
| O  | -0.60320000 | -1.83592300 | 1.16579900  |
| H  | -0.19312600 | -1.47874400 | 1.96671400  |
| H  | -1.57028500 | -1.94095700 | 1.35399700  |
| O  | -0.54138200 | 1.05006500  | -1.64170300 |
| H  | -0.54318500 | 0.64928800  | -2.52314800 |
| H  | 0.36251100  | 1.42355000  | -1.50619400 |

**S-T2←(H<sub>2</sub>O)<sub>2</sub>·(H<sub>2</sub>O)<sub>2</sub><sup>a(b)</sup>**

|   |             |             |             |
|---|-------------|-------------|-------------|
| C | -4.13566000 | -0.65067100 | -0.32987500 |
| H | -4.51377800 | 1.26727900  | 0.58934500  |
| H | -5.62428800 | 0.85261800  | -0.74227700 |
| C | -4.58737700 | 0.79285000  | -0.39654300 |
| H | -3.95738800 | 1.34444300  | -1.09833100 |
| N | -5.04625000 | -1.41229100 | 0.57690900  |
| H | -6.01032600 | -1.37476700 | 0.23209400  |
| H | -5.02857500 | -1.01506200 | 1.52266800  |
| C | -2.71044500 | -0.77989000 | 0.18644500  |
| O | -2.51773400 | -1.30163900 | 1.30216600  |
| O | -1.83407600 | -0.30874700 | -0.60652600 |
| H | -4.76792400 | -2.39525700 | 0.65306300  |

|    |             |             |             |
|----|-------------|-------------|-------------|
| H  | -4.19840300 | -1.12841400 | -1.31241300 |
| C  | 4.36996300  | 0.29393000  | -0.11734300 |
| H  | 5.27989800  | 0.06251200  | -2.08633000 |
| H  | 6.36630800  | 0.67396500  | -0.81356500 |
| C  | 5.34157900  | 0.71240000  | -1.20256000 |
| H  | 5.15224700  | 1.74121500  | -1.52071400 |
| N  | 4.62641700  | -1.12800800 | 0.25523600  |
| H  | 5.58595000  | -1.22423100 | 0.60043600  |
| H  | 4.51725500  | -1.77009300 | -0.53945300 |
| C  | 2.95602200  | 0.47039500  | -0.40079800 |
| O  | 2.13113400  | -0.46281500 | -0.28653400 |
| O  | 2.51966400  | 1.66696500  | -0.74117400 |
| H  | 3.99466900  | -1.44551800 | 0.99605200  |
| H  | 4.67768100  | 1.05710800  | 0.90814500  |
| Cu | 0.12468200  | -0.28442700 | -0.35790800 |
| O  | 5.06982800  | 1.91882700  | 1.80748800  |
| H  | 6.03472200  | 1.90480900  | 1.77998100  |
| H  | 4.53724000  | 3.11727700  | 0.75475400  |
| O  | 4.11728600  | 3.62294000  | -0.00248300 |
| H  | 3.16953200  | 2.42173000  | -0.55847800 |
| H  | 3.56495500  | 4.30246600  | 0.40434600  |
| O  | 0.12707900  | -1.44988100 | 1.26455700  |
| H  | 0.61224800  | -1.00263700 | 1.97329900  |
| H  | -0.83029000 | -1.45505500 | 1.52284700  |
| O  | 0.10882300  | 0.92270700  | -1.99481100 |
| H  | 0.09750000  | 0.37411500  | -2.79322100 |
| H  | 0.97275000  | 1.37161500  | -1.99065900 |

**I2←(H<sub>2</sub>O)<sub>2</sub>·(H<sub>2</sub>O)<sub>2</sub><sup>a(b)</sup>**

|   |            |             |             |
|---|------------|-------------|-------------|
| C | 3.71632100 | -0.20067600 | -0.51655400 |
| H | 5.82118800 | 0.16794200  | -0.37699700 |
| H | 4.85517200 | 1.05454800  | 0.81239900  |
| C | 4.86552800 | 0.68977700  | -0.22645500 |
| H | 4.85525700 | 1.56116800  | -0.88690500 |
| N | 3.72657000 | -1.48386600 | 0.19519000  |
| H | 3.75459700 | -1.35508800 | 1.21411800  |
| H | 4.53517200 | -2.06446900 | -0.05602500 |
| C | 2.64686200 | -0.00843000 | -1.32689000 |
| O | 1.74639800 | -0.91708500 | -1.56664800 |
| O | 2.47262900 | 1.18796100  | -1.98158200 |

|    |             |             |             |
|----|-------------|-------------|-------------|
| H  | 2.87315300  | -2.00839100 | -0.03739800 |
| H  | 2.61426700  | 0.57564500  | 2.17728700  |
| C  | -4.19565600 | -0.40030100 | 0.13701600  |
| H  | -4.12428600 | 1.59920000  | 0.95105900  |
| H  | -5.58380800 | 1.24321200  | -0.00853300 |
| C  | -4.50364300 | 1.08003500  | 0.06273400  |
| H  | -4.03166700 | 1.51141800  | -0.82296100 |
| N  | -4.90668500 | -0.99322800 | 1.30994500  |
| H  | -5.91878100 | -0.86271600 | 1.21920300  |
| H  | -4.60218400 | -0.54344100 | 2.18027300  |
| C  | -2.70451400 | -0.67423500 | 0.27452200  |
| O  | -2.28205600 | -1.20879000 | 1.31850700  |
| O  | -2.02135000 | -0.30152700 | -0.73159500 |
| H  | -4.71397000 | -1.99515400 | 1.40128000  |
| H  | -4.56593700 | -0.92384000 | -0.75025900 |
| Cu | -0.08160700 | -0.52608200 | -1.00277000 |
| O  | 1.73032300  | 0.81640200  | 1.86458800  |
| H  | 1.26829800  | 1.12458100  | 2.65688500  |
| H  | 2.08649000  | 2.27424100  | 0.74571200  |
| O  | 2.35364800  | 2.93980600  | 0.07772400  |
| H  | 2.53622700  | 1.93189800  | -1.32827700 |
| H  | 1.58310300  | 3.51144400  | -0.03290500 |
| O  | 0.35470900  | -1.38098200 | 0.78228800  |
| H  | 0.87041800  | -0.67849100 | 1.23955500  |
| H  | -0.53972900 | -1.38182400 | 1.20052800  |
| O  | -0.24502100 | 0.85167400  | -2.54723000 |
| H  | -0.47801400 | 0.38121700  | -3.36061900 |
| H  | 0.69831300  | 1.10090700  | -2.64272400 |

## 2.2.2 Coordinates of stationary points of the second, fourth, fifth primitive reactions in channel c

S-II·H<sub>2</sub>O<sup>c</sup>

|   |             |            |            |
|---|-------------|------------|------------|
| C | -3.62463800 | 1.16127900 | 0.07300300 |
| H | -3.51243700 | 2.19985900 | 1.96432000 |
| H | -4.57575000 | 2.96878700 | 0.75818200 |
| C | -3.63259400 | 2.43108700 | 0.89923600 |
| H | -2.81376200 | 3.08378200 | 0.58776500 |
| N | -4.78847800 | 0.30711500 | 0.44127900 |
| H | -5.66255000 | 0.82333700 | 0.31086400 |

|    |             |             |             |
|----|-------------|-------------|-------------|
| H  | -4.73082400 | 0.02450500  | 1.42489600  |
| C  | -2.34829500 | 0.35906100  | 0.26539400  |
| O  | -2.37215600 | -0.77427500 | 0.76048900  |
| O  | -1.29173800 | 0.98011400  | -0.12120400 |
| H  | -4.80720500 | -0.55374900 | -0.14711200 |
| H  | -3.72910500 | 1.39027700  | -0.99347100 |
| C  | 4.43218200  | -0.49791200 | 0.02100600  |
| H  | 4.63938500  | -0.81877400 | -2.10580800 |
| H  | 6.17903800  | -0.78621600 | -1.20670500 |
| C  | 5.18313100  | -0.33897400 | -1.28366700 |
| H  | 5.29957900  | 0.72266500  | -1.51331000 |
| N  | 4.32808200  | -1.95006200 | 0.36095300  |
| H  | 5.26167400  | -2.36573500 | 0.43719800  |
| H  | 3.81496000  | -2.45825600 | -0.36778400 |
| C  | 3.04993500  | 0.12714400  | -0.03787100 |
| O  | 2.06290000  | -0.66875800 | 0.18992200  |
| O  | 2.95103400  | 1.33082800  | -0.29530700 |
| H  | 3.83487500  | -2.09926600 | 1.24595600  |
| H  | 4.97793800  | -0.02511200 | 0.84434700  |
| Cu | 0.36308900  | 0.12048500  | 0.06534900  |
| O  | -4.30703300 | -1.87787000 | -1.29176200 |
| H  | -4.88811500 | -2.64927500 | -1.26698900 |
| H  | -3.52089200 | -2.13929100 | -0.78965800 |

**S-T2·H<sub>2</sub>O<sup>c</sup>**

|   |             |             |             |
|---|-------------|-------------|-------------|
| C | -4.50524500 | 0.12108600  | -0.04952500 |
| H | -3.97144500 | 1.37330900  | 1.63031200  |
| H | -5.19637100 | 2.05862300  | 0.53960600  |
| C | -4.26866800 | 1.47817100  | 0.58024600  |
| H | -3.49209900 | 2.03804600  | 0.05174000  |
| N | -5.63315200 | -0.60100500 | 0.57204400  |
| H | -6.46164300 | -0.01328800 | 0.48876400  |
| H | -5.45574200 | -0.70179400 | 1.57239100  |
| C | -3.25489200 | -0.74951700 | -0.08603700 |
| O | -3.30470300 | -1.97277700 | -0.42156400 |
| O | -2.15538700 | -0.18735400 | 0.17928100  |
| H | -5.82550200 | -1.94043100 | -0.14011400 |
| H | -4.76550200 | 0.25227800  | -1.11158800 |
| C | 3.50979000  | -2.01972600 | -0.30016200 |
| H | 3.62077100  | -1.73930300 | -2.44017300 |
| H | 5.17849700  | -2.11892600 | -1.65978000 |
| C | 4.23770500  | -1.57050000 | -1.54965700 |

|    |             |             |             |
|----|-------------|-------------|-------------|
| H  | 4.46627500  | -0.50456000 | -1.47824900 |
| N  | 3.25662900  | -3.49150900 | -0.37798600 |
| H  | 4.14260500  | -3.99939400 | -0.46583800 |
| H  | 2.67868100  | -3.71979300 | -1.19427900 |
| C  | 2.20606900  | -1.26427300 | -0.11357700 |
| O  | 1.13393900  | -1.97380900 | -0.17860500 |
| O  | 2.24894100  | -0.04448000 | 0.07009700  |
| H  | 2.76826100  | -3.84056100 | 0.45205800  |
| H  | 4.12459900  | -1.85631400 | 0.59082900  |
| Cu | -0.50752300 | -1.09026700 | -0.00132100 |
| O  | -5.53911200 | -2.76488300 | -0.74816700 |
| H  | -5.72359700 | -3.58650800 | -0.26864000 |
| H  | -4.41143200 | -2.47851700 | -0.64603300 |

**S-12·H<sub>2</sub>O<sup>c</sup>**

|    |             |             |             |
|----|-------------|-------------|-------------|
| C  | -4.59071100 | 0.07103300  | -0.08653100 |
| H  | -3.84828100 | 1.74512700  | 1.06294100  |
| H  | -5.30058300 | 2.07733000  | 0.09369900  |
| C  | -4.33963200 | 1.55283500  | 0.10210200  |
| H  | -3.71719400 | 1.96423200  | -0.69871300 |
| N  | -5.48183200 | -0.51894500 | 0.92128200  |
| H  | -6.35681800 | 0.00211800  | 0.89242900  |
| H  | -5.08875100 | -0.35402300 | 1.84781300  |
| C  | -3.30347300 | -0.72364000 | -0.15233500 |
| O  | -3.32557800 | -2.01272200 | -0.30722100 |
| O  | -2.20483900 | -0.14301200 | -0.08729000 |
| H  | -5.95750700 | -2.23441100 | 0.30455800  |
| H  | -5.06107100 | -0.09869800 | -1.06862500 |
| C  | 3.46415400  | -2.14758300 | -0.25209200 |
| H  | 4.11433700  | -1.22297400 | -2.09321200 |
| H  | 5.40604200  | -2.04064400 | -1.17490700 |
| C  | 4.50095000  | -1.43133600 | -1.08889500 |
| H  | 4.76752100  | -0.48486300 | -0.61299700 |
| N  | 3.15457300  | -3.47300600 | -0.87031600 |
| H  | 3.99786700  | -4.05454100 | -0.90655000 |
| H  | 2.81040900  | -3.35805700 | -1.82980800 |
| C  | 2.19132300  | -1.33573100 | -0.08416000 |
| O  | 1.10690000  | -1.92581100 | -0.45220700 |
| O  | 2.26376600  | -0.19955600 | 0.39026900  |
| H  | 2.43475200  | -3.97780200 | -0.34440100 |
| H  | 3.85180900  | -2.35799800 | 0.75087300  |
| Cu | -0.51911700 | -1.03374400 | -0.24446800 |



|   |             |             |             |
|---|-------------|-------------|-------------|
| O | -5.76678400 | -2.96668100 | -0.33118300 |
| H | -5.83306400 | -3.78792200 | 0.17373800  |
| H | -4.24908500 | -2.42636200 | -0.36690300 |

*S*-I3<sup>c</sup>·(H<sub>2</sub>O)<sub>2</sub>m<sup>c</sup>

|    |             |             |             |
|----|-------------|-------------|-------------|
| C  | -3.64446800 | 0.26885900  | 0.61519200  |
| H  | -4.66191200 | -0.18010800 | -1.24079600 |
| H  | -4.94177900 | -1.34930500 | 0.06890400  |
| C  | -4.18840600 | -0.71530700 | -0.40901000 |
| H  | -3.39661000 | -1.35524500 | -0.80702300 |
| N  | -4.72484500 | 1.03181000  | 1.21521700  |
| H  | -5.24709000 | 1.51964400  | 0.48883100  |
| H  | -4.36081200 | 1.73910800  | 1.84944300  |
| C  | -2.53742600 | 1.09620200  | 0.01070800  |
| O  | -2.60752700 | 2.38480800  | 0.21896800  |
| O  | -1.61183500 | 0.55152700  | -0.61181300 |
| H  | -1.84672300 | 2.86015300  | -0.16750500 |
| H  | -3.13836800 | -0.29997900 | 1.41328100  |
| C  | 3.65189500  | 2.09018700  | -3.01893600 |
| H  | 4.86398200  | 1.82960200  | -1.24916400 |
| H  | 5.78875400  | 2.11168800  | -2.74771400 |
| C  | 4.91022400  | 1.61571100  | -2.32335400 |
| H  | 5.02204400  | 0.53788800  | -2.46235600 |
| N  | 3.53521300  | 3.57400800  | -2.88119100 |
| H  | 4.35149600  | 4.03334500  | -3.29801800 |
| H  | 3.48884800  | 3.84753600  | -1.89349000 |
| C  | 2.41273800  | 1.40602300  | -2.47223300 |
| O  | 2.31369700  | 0.18106800  | -2.57628600 |
| O  | 1.53853700  | 2.17997200  | -1.92561800 |
| H  | 2.69443500  | 3.93547200  | -3.34178000 |
| H  | 3.69844900  | 1.88040000  | -4.09279800 |
| Cu | -0.00822200 | 1.37710300  | -1.27755300 |
| O  | -3.64450700 | -2.69115000 | 2.58687300  |
| H  | -3.44067200 | -2.75295100 | 1.64564300  |
| H  | -4.44975100 | -2.13251200 | 2.62915400  |
| O  | -5.93409900 | -1.05144400 | 2.68376200  |
| H  | -5.60806400 | -0.25090500 | 2.20082600  |
| H  | -6.09199400 | -0.75734000 | 3.58922200  |

S-T4·(H<sub>2</sub>O)<sub>2</sub>m<sup>c</sup>

|    |             |             |             |
|----|-------------|-------------|-------------|
| C  | -3.76768900 | 0.21605300  | 0.42096200  |
| H  | -4.83434200 | -0.11293400 | -1.44980000 |
| H  | -5.12742600 | -1.32685500 | -0.17981300 |
| C  | -4.36743000 | -0.68120200 | -0.63449500 |
| H  | -3.59452100 | -1.32896100 | -1.05742400 |
| N  | -4.82691200 | 1.01818200  | 1.09602400  |
| H  | -5.44102200 | 1.49496500  | 0.42674600  |
| H  | -4.43185400 | 1.72780200  | 1.71925900  |
| C  | -2.63727900 | 1.01798800  | 0.01595900  |
| O  | -2.50506400 | 2.18943200  | 0.61695000  |
| O  | -1.79252700 | 0.58021100  | -0.79685400 |
| H  | -1.67854000 | 2.63533700  | 0.35875200  |
| H  | -3.34769200 | -0.59560500 | 1.32435300  |
| C  | 3.58117500  | 2.07323500  | -2.95354700 |
| H  | 4.71080600  | 1.59561500  | -1.17484700 |
| H  | 5.70446200  | 1.97372300  | -2.60661800 |
| C  | 4.79034700  | 1.48021200  | -2.26204100 |
| H  | 4.86340500  | 0.41593200  | -2.49753700 |
| N  | 3.52915800  | 3.54320700  | -2.68697000 |
| H  | 4.36942500  | 4.00029200  | -3.05550800 |
| H  | 3.48272600  | 3.73205600  | -1.67958400 |
| C  | 2.29352000  | 1.40716000  | -2.50523500 |
| O  | 2.14881700  | 0.19780300  | -2.70145600 |
| O  | 1.43278100  | 2.17714400  | -1.93323900 |
| H  | 2.70953400  | 3.97933000  | -3.12035200 |
| H  | 3.65679000  | 1.95717100  | -4.03980400 |
| Cu | -0.14520500 | 1.38395100  | -1.33735700 |
| O  | -3.17135300 | -1.54112500 | 2.26974300  |
| H  | -3.07014600 | -2.35627600 | 1.76216400  |
| H  | -4.81934700 | -1.38916700 | 2.65556100  |
| O  | -5.77802400 | -1.10983000 | 2.70487600  |
| H  | -5.39821800 | 0.36974000  | 1.68264400  |
| H  | -5.93408600 | -0.86523800 | 3.62501200  |

I4·(H<sub>2</sub>O)<sub>2</sub>m<sup>c</sup>

|   |             |             |             |
|---|-------------|-------------|-------------|
| C | -4.10933800 | 0.46967700  | -0.06183600 |
| H | -5.36112200 | -0.91546000 | -1.13316400 |
| H | -4.55208100 | -1.60063600 | 0.28311200  |
| C | -4.42815800 | -0.89525500 | -0.55048900 |
| H | -3.62411200 | -1.26924200 | -1.19042400 |

|    |             |             |             |
|----|-------------|-------------|-------------|
| N  | -5.01999800 | 0.99367900  | 0.95901000  |
| H  | -5.99938200 | 0.91128500  | 0.66262800  |
| H  | -4.84067400 | 1.98386900  | 1.15134600  |
| C  | -3.15039700 | 1.30153900  | -0.54883000 |
| O  | -3.00675100 | 2.52822600  | 0.04010200  |
| O  | -2.37023900 | 0.99964100  | -1.54093700 |
| H  | -2.42148500 | 3.07289300  | -0.50963400 |
| H  | -2.29827600 | -0.43406300 | 1.07077900  |
| C  | 3.19383900  | 2.35727200  | -3.05088800 |
| H  | 4.02648500  | 0.39777600  | -2.68460300 |
| H  | 5.13130600  | 1.53051800  | -3.50581400 |
| C  | 4.09089900  | 1.19865600  | -3.43068300 |
| H  | 3.78582800  | 0.79900200  | -4.40056000 |
| N  | 3.65863600  | 2.93577700  | -1.75256900 |
| H  | 4.63363400  | 3.24288900  | -1.82587800 |
| H  | 3.60071800  | 2.23751400  | -1.00354600 |
| C  | 1.73766500  | 1.93534400  | -2.94472400 |
| O  | 1.17738300  | 1.49078300  | -3.95255400 |
| O  | 1.20197900  | 2.07161900  | -1.78456200 |
| H  | 3.08817500  | 3.73741800  | -1.46844700 |
| H  | 3.25970900  | 3.16177700  | -3.79090200 |
| Cu | -0.59069300 | 1.51284000  | -1.58817500 |
| O  | -1.92096000 | -1.01823400 | 1.75133000  |
| H  | -1.94378900 | -1.89750100 | 1.34998200  |
| H  | -3.45410600 | -0.86762900 | 2.80161200  |
| O  | -4.35220600 | -0.66855300 | 3.14109100  |
| H  | -4.90832400 | 0.46174000  | 1.85448100  |
| H  | -4.21319500 | -0.20846300 | 3.97847300  |

I4·(H<sub>2</sub>O)<sub>2n</sub><sup>c</sup>

|   |             |             |             |
|---|-------------|-------------|-------------|
| C | 0.05704200  | 1.68060000  | -2.55454600 |
| H | -0.21264000 | 3.81243800  | -2.59355300 |
| H | 1.14436800  | 3.27544900  | -1.59223000 |
| C | 0.12247600  | 3.01911700  | -1.91048100 |
| H | -0.52063900 | 3.04770400  | -1.02618300 |
| N | 0.76561800  | 1.57831800  | -3.83469500 |
| H | 0.71908400  | 0.62776800  | -4.21312900 |
| H | -0.88069600 | -1.30192200 | -2.40299200 |
| C | -0.44414000 | 0.54095500  | -2.00897700 |
| O | -0.25181600 | -0.62587700 | -2.69689900 |
| O | -1.08257600 | 0.51161400  | -0.87751800 |
| H | 0.33214200  | 2.22261000  | -4.53364700 |

|    |             |             |             |
|----|-------------|-------------|-------------|
| H  | 1.75829700  | 1.82358000  | -3.74581600 |
| C  | -3.92169500 | -3.24790700 | 2.68636400  |
| H  | -2.19092100 | -3.81756400 | 3.84681700  |
| H  | -3.74581600 | -4.39397800 | 4.50268500  |
| C  | -3.24453400 | -3.55842000 | 4.00442000  |
| H  | -3.29627200 | -2.68547100 | 4.65926300  |
| N  | -3.90172500 | -4.46590400 | 1.82048700  |
| H  | -4.38998800 | -5.24064300 | 2.28092300  |
| H  | -2.93763900 | -4.76489700 | 1.63704300  |
| C  | -3.25931300 | -2.08414500 | 1.97149800  |
| O  | -2.74819600 | -2.34938600 | 0.81902900  |
| O  | -3.24169800 | -0.97950200 | 2.52299800  |
| H  | -4.34925900 | -4.29584800 | 0.91514400  |
| H  | -4.97526000 | -2.99178000 | 2.83939100  |
| Cu | -1.90459200 | -0.93121500 | -0.05911100 |
| O  | -0.83373000 | 3.34099400  | -5.37836400 |
| H  | -1.64547000 | 3.14420200  | -4.86625000 |
| H  | -1.01974400 | 3.04737300  | -6.27907200 |
| O  | -2.81254800 | 2.57266200  | -3.50105700 |
| H  | -2.93774900 | 3.33456500  | -2.91969100 |
| H  | -2.07610300 | 2.07876700  | -3.09428900 |

R-all-T5·(H<sub>2</sub>O)<sub>2n</sub><sup>c</sup>

|   |             |             |             |
|---|-------------|-------------|-------------|
| C | -4.03025100 | -0.60906200 | 1.08417200  |
| H | -3.90353300 | 1.51669700  | 0.85749100  |
| H | -2.41283900 | 0.78817400  | 1.50535900  |
| C | -3.50953400 | 0.73765500  | 1.52025400  |
| H | -3.85583100 | 0.96136000  | 2.53316800  |
| N | -3.68347200 | -0.87658100 | -0.34041700 |
| H | -3.90627000 | -1.83713700 | -0.61619700 |
| H | -3.56020900 | -3.63106300 | 2.01007300  |
| C | -3.73734700 | -1.72856400 | 1.94776400  |
| O | -3.67161200 | -2.91345200 | 1.36089700  |
| O | -3.64535200 | -1.58722200 | 3.18848300  |
| H | -4.25395600 | -0.23938500 | -0.94045900 |
| H | -2.68831700 | -0.71913500 | -0.53381200 |
| C | -3.31130800 | -4.85971000 | 8.17320000  |
| H | -1.16986200 | -5.15248900 | 8.17412800  |
| H | -1.99178300 | -5.67167100 | 9.66932700  |
| C | -1.97358700 | -4.91348000 | 8.88008600  |
| H | -1.76165200 | -3.94465900 | 9.33816000  |
| N | -3.63865900 | -6.20877300 | 7.61743000  |

|    |             |             |             |
|----|-------------|-------------|-------------|
| H  | -3.68574800 | -6.90097200 | 8.37169000  |
| H  | -2.91961800 | -6.51517300 | 6.95289200  |
| C  | -3.33244200 | -3.81451300 | 7.07308000  |
| O  | -3.61372500 | -4.24628900 | 5.88972200  |
| O  | -3.08749200 | -2.64032400 | 7.36095600  |
| H  | -4.53678500 | -6.20839800 | 7.12440100  |
| H  | -4.11297500 | -4.61266900 | 8.87726800  |
| Cu | -3.62506100 | -2.95402500 | 4.53638300  |
| O  | -5.67762400 | 0.79834800  | -1.43979000 |
| H  | -6.16623300 | 0.51040300  | -0.61610900 |
| H  | -6.14969200 | 0.39811800  | -2.18000500 |
| O  | -6.59997400 | -0.13414200 | 0.89267000  |
| H  | -6.72921200 | 0.61821400  | 1.48385700  |
| H  | -5.30699400 | -0.47791900 | 1.08110100  |

R-all-I5·(H<sub>2</sub>O)<sub>2n</sub><sup>c</sup>

|   |             |             |             |
|---|-------------|-------------|-------------|
| C | -0.15033800 | 1.75948100  | -2.84560400 |
| H | 0.37011800  | 3.83301400  | -3.00281400 |
| H | 1.68688800  | 2.80705100  | -2.39324600 |
| C | 0.60510800  | 2.98272700  | -2.35527800 |
| H | 0.32702100  | 3.23977400  | -1.32997900 |
| N | 0.12733800  | 1.51307000  | -4.25092100 |
| H | -0.31639500 | 0.65259500  | -4.56351800 |
| H | 0.29255100  | -1.30791100 | -1.88717100 |
| C | 0.07989300  | 0.57970800  | -1.93464500 |
| O | 0.19876400  | -0.57896200 | -2.52992800 |
| O | 0.10072100  | 0.72004200  | -0.70248200 |
| H | -0.78469200 | 2.92533600  | -5.02521800 |
| H | 1.13069200  | 1.40271900  | -4.38972800 |
| C | 0.40196800  | -2.56917200 | 4.28718300  |
| H | 2.54641100  | -2.80576000 | 4.40810000  |
| H | 1.65583200  | -3.34695500 | 5.85530000  |
| C | 1.69838800  | -2.58820700 | 5.06761600  |
| H | 1.85925500  | -1.61475300 | 5.53634900  |
| N | 0.14407100  | -3.92503700 | 3.71287200  |
| H | 0.06123300  | -4.61882600 | 4.46259100  |
| H | 0.91423300  | -4.21498700 | 3.10016100  |
| C | 0.40585000  | -1.52171600 | 3.18847000  |
| O | 0.13748500  | -1.95131600 | 2.00087700  |
| O | 0.64734200  | -0.34821800 | 3.48051600  |
| H | -0.71672400 | -3.94484100 | 3.15754700  |
| H | -0.44506400 | -2.34682000 | 4.94559200  |

|    |             |             |             |
|----|-------------|-------------|-------------|
| Cu | 0.13143800  | -0.65568300 | 0.65274900  |
| O  | -1.36839300 | 3.69347900  | -5.24475900 |
| H  | -2.37335600 | 3.86718500  | -3.71125700 |
| H  | -1.92210100 | 3.39114700  | -5.97524800 |
| O  | -2.89167300 | 3.94121600  | -2.88189300 |
| H  | -2.22786400 | 4.04890300  | -2.18949000 |
| H  | -1.23311700 | 1.95028500  | -2.74027000 |

### 2.2.3 Coordinates of stationary points of the fourth primitive reactions in channel d

#### R-allo-I3·(H<sub>2</sub>O)<sub>2</sub><sup>d</sup>

|    |             |             |             |
|----|-------------|-------------|-------------|
| C  | -3.18690600 | 3.89669100  | -0.57007000 |
| H  | -3.50832000 | 5.75418400  | -1.61230200 |
| H  | -2.07883400 | 4.84244300  | -2.16561700 |
| C  | -2.67232400 | 5.12620300  | -1.28866300 |
| H  | -2.04332000 | 5.71031900  | -0.61280300 |
| N  | -4.09514000 | 3.13593500  | -1.48150700 |
| H  | -4.87422100 | 3.72918700  | -1.78385500 |
| H  | -3.59132700 | 2.82375800  | -2.31884200 |
| C  | -2.04920300 | 3.01013900  | -0.09627700 |
| O  | -2.01098500 | 1.83018300  | -0.61624500 |
| O  | -1.24361800 | 3.45867800  | 0.72171500  |
| H  | -3.78353900 | 4.17499700  | 0.30481200  |
| H  | -4.48350400 | 2.30407800  | -1.02683200 |
| C  | 1.83057600  | -2.75775200 | 0.40778100  |
| H  | 2.93278500  | -2.38372400 | -1.41703700 |
| H  | 3.92567400  | -2.89481000 | -0.03380000 |
| C  | 3.07050600  | -2.28122700 | -0.33380900 |
| H  | 3.29528200  | -1.23652900 | -0.10464400 |
| N  | 1.61217800  | -4.17589200 | 0.18059100  |
| H  | 0.74977100  | -4.48505600 | 0.62326700  |
| H  | -1.18711300 | -1.85483900 | -0.38369400 |
| C  | 0.65502800  | -1.86778100 | 0.08688800  |
| O  | -0.45484300 | -2.48150800 | -0.23094800 |
| O  | 0.76472600  | -0.63404100 | 0.16188200  |
| H  | 1.51829300  | -4.35572200 | -0.81795300 |
| H  | 1.98944100  | -2.60222800 | 1.48775900  |
| Cu | -0.61521900 | 0.68611000  | -0.16256000 |

|   |            |             |            |
|---|------------|-------------|------------|
| O | 3.83201200 | -2.73604800 | 3.19297500 |
| H | 4.16320700 | -2.92043600 | 4.07974300 |
| H | 3.83212400 | -3.60396200 | 2.73587900 |
| O | 3.74784000 | -5.15056000 | 1.74497600 |
| H | 4.55584800 | -5.18112500 | 1.21770900 |
| H | 3.03041600 | -4.91104100 | 1.10640600 |

R-allo-T4·(H<sub>2</sub>O)<sub>2</sub><sup>d</sup>

|    |             |             |             |
|----|-------------|-------------|-------------|
| C  | -2.64150700 | 2.82537200  | 0.75737100  |
| H  | -3.36135300 | 4.54106800  | -0.32813100 |
| H  | -2.11021200 | 3.60381600  | -1.18644000 |
| C  | -2.43338000 | 3.97361100  | -0.20640700 |
| H  | -1.66718500 | 4.64690300  | 0.18454300  |
| N  | -3.74369100 | 1.94898200  | 0.25575400  |
| H  | -4.61709700 | 2.48079100  | 0.18395000  |
| H  | -3.52272000 | 1.58082700  | -0.67606700 |
| C  | -1.37328100 | 2.01589100  | 0.96353900  |
| O  | -1.46431400 | 0.75870000  | 0.69037500  |
| O  | -0.36042600 | 2.58785200  | 1.37198100  |
| H  | -2.96076900 | 3.19347100  | 1.73826400  |
| H  | -3.90355400 | 1.14742300  | 0.87329900  |
| C  | 2.41003900  | -3.71651500 | 1.48744100  |
| H  | 3.85037500  | -3.36505000 | -0.10860000 |
| H  | 4.54144700  | -3.91296100 | 1.43873200  |
| C  | 3.76512100  | -3.28721300 | 0.98331200  |
| H  | 3.96229300  | -2.25237300 | 1.27611700  |
| N  | 2.17760900  | -5.16235600 | 1.21437100  |
| H  | 1.22947700  | -5.45415700 | 1.46770900  |
| H  | -0.61713300 | -2.86615500 | 0.90950700  |
| C  | 1.28632100  | -2.88692900 | 1.12148800  |
| O  | 0.10994000  | -3.49284300 | 1.07524400  |
| O  | 1.41983900  | -1.65316200 | 0.95517200  |
| H  | 2.32625900  | -5.40267300 | 0.22819100  |
| H  | 2.50556900  | -3.65388700 | 2.76482300  |
| Cu | 0.02779400  | -0.33784200 | 0.89212200  |
| O  | 2.88924600  | -3.75849300 | 4.05737300  |
| H  | 2.07563900  | -3.89957700 | 4.55672900  |
| H  | 3.56470200  | -5.26912800 | 3.70088400  |
| O  | 3.84464300  | -6.13455900 | 3.28413700  |
| H  | 4.78095900  | -6.02911800 | 3.07482800  |
| H  | 2.84257300  | -5.71087300 | 1.80463700  |

I4·(H<sub>2</sub>O)<sub>2</sub><sup>d</sup>

|    |             |             |             |
|----|-------------|-------------|-------------|
| C  | -2.63180800 | 3.61825500  | -0.13524500 |
| H  | -3.52577900 | 5.37966200  | -0.99864400 |
| H  | -2.72752300 | 4.30852900  | -2.18039600 |
| C  | -2.66519900 | 4.72488500  | -1.16806800 |
| H  | -1.75547700 | 5.32516500  | -1.09248800 |
| N  | -3.90462200 | 2.83765200  | -0.20450400 |
| H  | -4.70865800 | 3.44839800  | -0.02885200 |
| H  | -4.02221300 | 2.41694600  | -1.13236900 |
| C  | -1.44066200 | 2.69660500  | -0.33112500 |
| O  | -1.71312600 | 1.46459400  | -0.57929300 |
| O  | -0.30558300 | 3.18030800  | -0.24966900 |
| H  | -2.57510800 | 4.03116200  | 0.87730800  |
| H  | -3.92175400 | 2.07786900  | 0.48181700  |
| C  | 2.20783600  | -2.75240600 | -0.43685600 |
| H  | 4.28842200  | -2.63466300 | -0.96349800 |
| H  | 3.95827500  | -2.45922800 | 0.76545700  |
| C  | 3.57629600  | -2.21685700 | -0.23653400 |
| H  | 3.58108000  | -1.12911800 | -0.34593700 |
| N  | 2.05451900  | -4.18131500 | -0.15483000 |
| H  | 1.13717100  | -4.52976900 | -0.44952800 |
| H  | -0.67620100 | -2.21618900 | -1.53376800 |
| C  | 1.13293900  | -2.07934200 | -0.92389400 |
| O  | -0.05891200 | -2.75069800 | -1.00902400 |
| O  | 1.16086200  | -0.84048900 | -1.31619200 |
| H  | 2.76609800  | -4.73505600 | -0.64529000 |
| H  | 1.60390100  | -1.51686800 | 1.58161600  |
| Cu | -0.23142400 | 0.31349800  | -0.87077600 |
| O  | 1.73706100  | -1.47146500 | 2.54205300  |
| H  | 0.86060200  | -1.28429900 | 2.90318900  |
| H  | 2.11975600  | -3.26338600 | 2.75883400  |
| O  | 2.26883000  | -4.22738600 | 2.65255500  |
| H  | 3.18518600  | -4.37355600 | 2.92010800  |
| H  | 2.15729600  | -4.36219300 | 0.87323100  |
